# Supplementary material for: Recent Advances in Superhydrophobic and Antibacterial Cellulose-Based Fibers and Fabrics: Bio-inspiration, Strategies, and Applications
Source: Springer Nature journal article supplement (doi:10.1007/s42765-023-00297-1), 2023-05-22
Supplement: MOESM1 [file 42765_2023_297_MOESM1_ESM.pdf]

Figure 1

Home

Help

Live Chat

Hua Zhou

Natural Bactericidal Surfaces: Mechanical Rupture of Pseudomonas aeruginosa Cells by Cicada Wings

Author: Russell J. Crawford, Christian L  bbe, Mark J. Tobin, et al

Publication: Small

Publisher: John Wiley and Sons

Date: Jun 4, 2012

Copyright   2012 WILEY-VCH Verlag GmbH & Co. KGaA, Weinheim

Order Completed

Thank you for your order.

This Agreement between Qing Dao University -- Hua Zhou ("You") and John Wiley and Sons ("John Wiley and Sons") consists of your license details and the terms and conditions provided by John Wiley and Sons and Copyright Clearance Center.

Your confirmation email will contain your order number for future reference.

License Number

5512360810586

Printable Details

License date

Mar 19, 2023

Licensed Content

Licensed Content Publisher

John Wiley and Sons

Licensed Content Publication

Small

Licensed Content Title

Natural Bactericidal Surfaces: Mechanical Rupture of Pseudomonas aeruginosa Cells by Cicada Wings

Licensed Content Author

Russell J. Crawford, Christian L  bbe, Mark J. Tobin, et al

Licensed Content Date

Jun 4, 2012

Licensed Content Volume

8

Licensed Content Issue

16

Licensed Content Pages

6

Order Details

Type of use

Journal/Magazine

Requestor type

University/Academic

Is the reuse sponsored by or associated with a pharmaceutical or medical products company?

no

Format

Electronic

Portion

Figure/table

Number of figures/tables

2

Will you be translating?

No

Circulation

500 - 999

About Your Work

Title of new article

Recent Advances in Superhydrophobic & Antibacterial Cellulose-based Fibers and Fabrics: Bio-Inspiration, Strategies and Applications

Lead author

Hua Zhou

Title of targeted journal

Advanced Fiber Materials

Publisher

Springer Nature

Expected publication date

Mar 2023

Additional Data

Order reference number

Figure 4

Portions

Figure 1,2

Requestor Location

Qing Dao University

Qingdao University

Requestor Location

Qing Dao, other

China

Attn: Qing Dao University

Tax Details

Publisher Tax ID

EU826007151

\$ Price

Total

0.00 USD

Would you like to purchase the full text of this article? If so, please continue on to the content ordering system located here: [Purchase PDF](#)

If you click on the buttons below or close this window, you will not be able to return to the content ordering system.

Total: 0.00 USD

CLOSE WINDOW

ORDER MORE

  2023 Copyright - All Rights Reserved | Copyright Clearance Center, Inc. | Privacy statement | Data Security and Privacy | For California Residents | Terms and ConditionsComments? We would like to hear from you. E-mail us at [customercare@copyright.com](mailto:customercare@copyright.com)

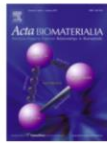

# A gecko skin micro/nano structure – A low adhesion, superhydrophobic, anti-wetting, self-cleaning, biocompatible, antibacterial surface

Author: Gregory S. Watson, David W. Green, Lin Schwarzkopf, Xin Li, Bronwen W. Cribb, Sverre Myhra, Jolanta A. Watson

Publication: Acta Biomaterialia

Publisher: Elsevier

Date: 15 July 2015

Copyright © 2015 Acta Materialia Inc. Published by Elsevier Ltd. All rights reserved.

## Order Completed

Thank you for your order.

This Agreement between Qing Dao University – Hua Zhou ("You") and Elsevier ("Elsevier") consists of your license details and the terms and conditions provided by Elsevier and Copyright Clearance Center.

Your confirmation email will contain your order number for future reference.

License Number 5512510888304

[Printable Details](#)

License date Mar 19, 2023

### Licensed Content

|                              |                                                                                                                                         |
|------------------------------|-----------------------------------------------------------------------------------------------------------------------------------------|
| Licensed Content Publisher   | Elsevier                                                                                                                                |
| Licensed Content Publication | Acta Biomaterialia                                                                                                                      |
| Licensed Content Title       | A gecko skin micro/nano structure – A low adhesion, superhydrophobic, anti-wetting, self-cleaning, biocompatible, antibacterial surface |
| Licensed Content Author      | Gregory S. Watson, David W. Green, Lin Schwarzkopf, Xin Li, Bronwen W. Cribb, Sverre Myhra, Jolanta A. Watson                           |
| Licensed Content Date        | Jul 15, 2015                                                                                                                            |
| Licensed Content Volume      | 21                                                                                                                                      |
| Licensed Content Issue       | n/a                                                                                                                                     |
| Licensed Content Pages       | 14                                                                                                                                      |

### Order Details

|                                              |                                |
|----------------------------------------------|--------------------------------|
| Type of Use                                  | reuse in a journal/magazine    |
| Requestor type                               | academic/educational institute |
| Portion                                      | figures/tables/illustrations   |
| Number of figures/tables/illustrations       | 4                              |
| Format                                       | electronic                     |
| Are you the author of this Elsevier article? | Yes                            |
| Will you be translating?                     | No                             |

### About Your Work

|                           |                                                                                                                                      |
|---------------------------|--------------------------------------------------------------------------------------------------------------------------------------|
| Title of new article      | Recent Advances in Superhydrophobic & Antibacterial Cellulose-based Fibers and Fabrics: Bio-Inspiration, Strategies and Applications |
| Lead author               | Hua Zhou                                                                                                                             |
| Title of targeted journal | Advanced Fiber Materials                                                                                                             |
| Publisher                 | Springer Nature                                                                                                                      |
| Expected publication date | Mar 2023                                                                                                                             |

### Additional Data

|                        |                |
|------------------------|----------------|
| Order reference number | Figure 5       |
| Portions               | Figure1,2,4,10 |

### Requestor Location

|                    |                                                       |
|--------------------|-------------------------------------------------------|
| Requestor Location | Qing Dao University<br>Qingdao University             |
|                    | Qing Dao, other<br>China<br>Attn: Qing Dao University |

### Tax Details

|                  |                |
|------------------|----------------|
| Publisher Tax ID | GB 494 6272 12 |
|------------------|----------------|

### \$ Price

|       |          |
|-------|----------|
| Total | 0.00 USD |
|-------|----------|

Total: 0.00 USD

[CLOSE WINDOW](#)

[ORDER MORE](#)

Payment Details

Review Details

Confirmation Details

Thank you, your order has been placed. An email confirmation has been sent to you. Your order license details and printable licenses will be available within 24 hours. Please access Manage Account for final order details.

## CUSTOMER INFORMATION

Payment by invoice: You can cancel your order until the invoice is generated by contacting customer service.

## Billing Address

Prof Hua Zhou  
Qing Dao University  
Qingdao University  
Qing Dao  
China

+86 13470894233  
67029905@qq.com

## PO Number (optional)

N/A

## Customer Location

Prof Hua Zhou  
Qing Dao University  
Qingdao University  
Qing Dao  
China

## Payment options

Invoice

## PENDING ORDER CONFIRMATION

Confirmation Number: Pending

 Print Friendly Format

Order Date: 19-Mar-2023

Includes Publisher Terms and Conditions

## 1. Journal of materials chemistry. B, Materials for biology and medicine

0.00 USD

Article: Biomimetics for early stage biofouling prevention: templates from insect cuticles.

## Order License ID

Pending

## Publisher

Royal Society of Chemistry

## ISSN

2050-7518

## Portion

Image/photo/illustration

## Type of Use

Republish in a  
journal/magazine

 View Details

 Print License

Total Items: 1

Total Due: 0.00 USD

Accepted: Marketplace Permissions General Terms and Conditions and any applicable Publisher Terms and Conditions

Continue Shopping

### Insect Analogue to the Lotus Leaf: A Planthopper Wing Membrane Incorporating a Low-Adhesion, Nonwetting, Superhydrophobic, Bactericidal, and Biocompatible Surface

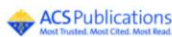

Author: Gregory S. Watson, David W. Green, Bronwen W. Cribb, et al

Publication: Applied Materials

Publisher: American Chemical Society

Date: Jul 1, 2017

Copyright © 2017, American Chemical Society

## PERMISSION/LICENSE IS GRANTED FOR YOUR ORDER AT NO CHARGE

This type of permission/license, instead of the standard Terms and Conditions, is sent to you because no fee is being charged for your order. Please note the following:

- Permission is granted for your request in both print and electronic formats, and translations.
- If figures and/or tables were requested, they may be adapted or used in part.
- Please print this page for your records and send a copy of it to your publisher/graduate school.
- Appropriate credit for the requested material should be given as follows: "Reprinted (adapted) with permission from {COMPLETE REFERENCE CITATION}. Copyright (YEAR) American Chemical Society." Insert appropriate information in place of the capitalized words.
- One-time permission is granted only for the use specified in your RightsLink request. No additional uses are granted (such as derivative works or other editions). For any uses, please submit a new request.

If credit is given to another source for the material you requested from RightsLink, permission must be obtained from that source.

BACK

CLOSE WINDOW

**Wetting characteristics of Colocasia esculenta (Taro) leaf and a bioinspired surface thereof**

**SPRINGER NATURE**

**Author:** Manish Kumar et al  
**Publication:** Scientific Reports  
**Publisher:** Springer Nature  
**Date:** Jan 22, 2020  
*Copyright © 2020, The Author(s)*

**Creative Commons**

This is an open access article distributed under the terms of the [Creative Commons CC BY](#) license, which permits unrestricted use, distribution, and reproduction in any medium, provided the original work is properly cited.

You are not required to obtain permission to reuse this article.

To request permission for a type of use not listed, please contact [Springer Nature](#)

Figure 2a



?

Help

🗨

Live Chat

**Wetting characteristics of Colocasia esculenta (Taro) leaf and a bioinspired surface thereof**  
Author: Manish Kumar et al  
Publication: Scientific Reports  
Publisher: Springer Nature  
Date: Jan 22, 2020  
Copyright © 2020, The Author(s)

**Creative Commons**  
This is an open access article distributed under the terms of the [Creative Commons CC BY](#) license, which permits unrestricted use, distribution, and reproduction in any medium, provided the original work is properly cited.  
You are not required to obtain permission to reuse this article.  
To request permission for a type of use not listed, please contact [Springer Nature](#)

© 2023 Copyright - All Rights Reserved | Copyright Clearance Center, Inc. | Privacy statement | Data Security and Privacy | For California Residents  
Terms and ConditionsComments? We would like to hear from you. E-mail us at [customer@copyright.com](mailto:customer@copyright.com)

Figure 2b-f



Home

?

Help

🗨

Live Chat

👤

Hua Zhou

**Nanostructure on Taro Leaves Resists Fouling by Colloids and Bacteria under Submerged Conditions**  
Author: Jianwei Ma, Yuekai Sun, Karla Gleichauf, et al  
Publication: Langmuir  
Publisher: American Chemical Society  
Date: Aug 1, 2011  
Copyright © 2011, American Chemical Society

**PERMISSION/LICENSE IS GRANTED FOR YOUR ORDER AT NO CHARGE**  
This type of permission/license, instead of the standard Terms and Conditions, is sent to you because no fee is being charged for your order. Please note the following:  

- Permission is granted for your request in both print and electronic formats, and translations.
- If figures and/or tables were requested, they may be adapted or used in part.
- Please print this page for your records and send a copy of it to your publisher/graduate school.
- Appropriate credit for the requested material should be given as follows: "Reprinted (adapted) with permission from (COMPLETE REFERENCE CITATION). Copyright (YEAR) American Chemical Society." Insert appropriate information in place of the capitalized words.
- One-time permission is granted only for the use specified in your RightsLink request. No additional uses are granted (such as derivative works or other editions). For any uses, please submit a new request.

  
If credit is given to another source for the material you requested from RightsLink, permission must be obtained from that source.

BACK

CLOSE WINDOW

© 2023 Copyright - All Rights Reserved | Copyright Clearance Center, Inc. | Privacy statement | Data Security and Privacy | For California Residents  
Terms and ConditionsComments? We would like to hear from you. E-mail us at [customer@copyright.com](mailto:customer@copyright.com)

Figure 3a-d

Home

Help

Live Chat

Hua Zhou

**Natural Bactericidal Surfaces: Mechanical Rupture of Pseudomonas aeruginosa Cells by Cicada Wings**

Author: Russell J. Crawford, Christian Löbbe, Mark J. Tobin, et al

Publication: Small

Publisher: John Wiley and Sons

Date: Jun 4, 2012

Copyright © 2012 WILEY-VCH Verlag GmbH & Co. KGaA, Weinheim

Order Completed

Thank you for your order.

This Agreement between Qing Dao University -- Hua Zhou ("You") and John Wiley and Sons ("John Wiley and Sons") consists of your license details and the terms and conditions provided by John Wiley and Sons and Copyright Clearance Center.

Your confirmation email will contain your order number for future reference.

License Number

5512360810586

[Printable Details](#)

License date

Mar 19, 2023

Licensed Content

Licensed Content Publisher

John Wiley and Sons

Licensed Content Publication

Small

Licensed Content Title

Natural Bactericidal Surfaces: Mechanical Rupture of Pseudomonas aeruginosa Cells by Cicada Wings

Licensed Content Author

Russell J. Crawford, Christian Löbbe, Mark J. Tobin, et al

Licensed Content Date

Jun 4, 2012

Licensed Content Volume

8

Licensed Content Issue

16

Licensed Content Pages

6

Order Details

Type of use

Journal/Magazine

Requestor type

University/Academic

Is the reuse sponsored by or associated with a pharmaceutical or medical products company?

no

Format

Electronic

Portion

Figure/table

Number of figures/tables

2

Will you be translating?

No

Circulation

500 - 999

About Your Work

Title of new article

Recent Advances in Superhydrophobic & Antibacterial Cellulose-based Fibers and Fabrics: Bio-Inspiration, Strategies and Applications

Lead author

Hua Zhou

Title of targeted journal

Advanced Fiber Materials

Publisher

Springer Nature

Expected publication date

Mar 2023

Additional Data

Order reference number

Figure 4

Portions

Figure 1,2

Requestor Location

Qing Dao University

Qingdao University

Requestor Location

Qing Dao, other

China

Attn: Qing Dao University

Tax Details

Publisher Tax ID

EU826007151

\$ Price

Total

0.00 USD

Would you like to purchase the full text of this article? If so, please continue on to the content ordering system located here:

[Purchase PDF](#)

If you click on the buttons below or close this window, you will not be able to return to the content ordering system.

Total: 0.00 USD

CLOSE WINDOW

ORDER MORE

© 2023 Copyright - All Rights Reserved | Copyright Clearance Center, Inc. | Privacy statement | Data Security and Privacy | For California Residents | Terms and ConditionsComments? We would like to hear from you. E-mail us at [customer@copyright.com](mailto:customer@copyright.com)





Home

Help

Live Chat

Hua Zhou

### Biophysical Model of Bacterial Cell Interactions with Nanopatterned Cicada Wing Surfaces



**Author:**  
Sergey Pogodin, Jafar Hasan, Vladimir A. Baulin, Hayden K. Webb, Vi Khanh Truong, The Hong Phong Nguyen, Veselin Boshkovikj, Christopher J. Fluke, Gregory S. Watson, Jolanta A. Watson, Russell J. Crawford, Elena P. Ivanova

**Publication:** Biophysical Journal

**Publisher:** Elsevier

**Date:** 19 February 2013

Copyright © 2013 Biophysical Society. Published by Elsevier Inc. All rights reserved.

#### Order Completed

Thank you for your order.

This Agreement between Qing Dao University – Hua Zhou ("You") and Elsevier ("Elsevier") consists of your license details and the terms and conditions provided by Elsevier and Copyright Clearance Center.

Your confirmation email will contain your order number for future reference.

**License Number** 5512361369254

**License date** Mar 19, 2023

**Licensed Content**

|                                     |                                                                                                                                                                                                                                                                                                                            |
|-------------------------------------|----------------------------------------------------------------------------------------------------------------------------------------------------------------------------------------------------------------------------------------------------------------------------------------------------------------------------|
| <b>Licensed Content Publisher</b>   | Elsevier                                                                                                                                                                                                                                                                                                                   |
| <b>Licensed Content Publication</b> | Biophysical Journal                                                                                                                                                                                                                                                                                                        |
| <b>Licensed Content Title</b>       | Biophysical Model of Bacterial Cell Interactions with Nanopatterned Cicada Wing Surfaces<br>Sergey Pogodin, Jafar Hasan, Vladimir A. Baulin, Hayden K. Webb, Vi Khanh Truong, The Hong Phong Nguyen, Veselin Boshkovikj, Christopher J. Fluke, Gregory S. Watson, Jolanta A. Watson, Russell J. Crawford, Elena P. Ivanova |
| <b>Licensed Content Author</b>      | Sergey Pogodin, Jafar Hasan, Vladimir A. Baulin, Hayden K. Webb, Vi Khanh Truong, The Hong Phong Nguyen, Veselin Boshkovikj, Christopher J. Fluke, Gregory S. Watson, Jolanta A. Watson, Russell J. Crawford, Elena P. Ivanova                                                                                             |
| <b>Licensed Content Date</b>        | Feb 19, 2013                                                                                                                                                                                                                                                                                                               |
| <b>Licensed Content Volume</b>      | 104                                                                                                                                                                                                                                                                                                                        |
| <b>Licensed Content Issue</b>       | 4                                                                                                                                                                                                                                                                                                                          |
| <b>Licensed Content Pages</b>       | 6                                                                                                                                                                                                                                                                                                                          |

**About Your Work**

|                                  |                                                                                                                                      |
|----------------------------------|--------------------------------------------------------------------------------------------------------------------------------------|
| <b>Title of new article</b>      | Recent Advances in Superhydrophobic & Antibacterial Cellulose-based Fibers and Fabrics: Bio-Inspiration, Strategies and Applications |
| <b>Lead author</b>               | Hua Zhou                                                                                                                             |
| <b>Title of targeted journal</b> | Advanced Fiber Materials                                                                                                             |
| <b>Publisher</b>                 | Springer Nature                                                                                                                      |
| <b>Expected publication date</b> | Mar 2023                                                                                                                             |

**Requestor Location**

|                           |                                                       |
|---------------------------|-------------------------------------------------------|
|                           | Qing Dao University<br>Qingdao University             |
| <b>Requestor Location</b> | Qing Dao, other<br>China<br>Attn: Qing Dao University |

**Price**

|              |          |
|--------------|----------|
| <b>Total</b> | 0.00 USD |
|--------------|----------|

[Printable Details](#)

**Order Details**

|                                                     |                                |
|-----------------------------------------------------|--------------------------------|
| <b>Type of Use</b>                                  | reuse in a journal/magazine    |
| <b>Requestor type</b>                               | academic/educational institute |
| <b>Portion</b>                                      | figures/tables/illustrations   |
| <b>Number of figures/tables/illustrations</b>       | 1                              |
| <b>Format</b>                                       | electronic                     |
| <b>Are you the author of this Elsevier article?</b> | Yes                            |
| <b>Will you be translating?</b>                     | No                             |

**Additional Data**

|                               |          |
|-------------------------------|----------|
| <b>Order reference number</b> | Figure 4 |
| <b>Portions</b>               | Figure 2 |

**Tax Details**

|                         |                |
|-------------------------|----------------|
| <b>Publisher Tax ID</b> | GB 494 6272 12 |
|-------------------------|----------------|

CLOSE WINDOW

Total: 0.00 USD

ORDER MORE

© 2023 Copyright - All Rights Reserved | Copyright Clearance Center, Inc. | Privacy statement | Data Security and Privacy | For California Residents | Terms and Conditions/Comments? We would like to hear from you. E-mail us at [customercare@copyright.com](mailto:customercare@copyright.com)

Figure 4

[Home](#)
[Help](#)
[Live Chat](#)
[Hua Zhou](#)

**A gecko skin micro/nano structure – A low adhesion, superhydrophobic, anti-wetting, self-cleaning, biocompatible, antibacterial surface**  
 Author: Gregory S. Watson, David W. Green, Lin Schwarzkopf, Xin Li, Bronwen W. Cribb, Sverre Myhra, Jolanta A. Watson  
 Publication: Acta Biomaterialia  
 Publisher: Elsevier  
 Date: 15 July 2015  
Copyright © 2015 Acta Materialia Inc. Published by Elsevier Ltd. All rights reserved.

### Order Completed

Thank you for your order.

This Agreement between Qing Dao University -- Hua Zhou ("You") and Elsevier ("Elsevier") consists of your license details and the terms and conditions provided by Elsevier and Copyright Clearance Center.

Your confirmation email will contain your order number for future reference.

License Number

5512510888304

License date

Mar 19, 2023

**Licensed Content**

|                              |                                                                                                                                         |
|------------------------------|-----------------------------------------------------------------------------------------------------------------------------------------|
| Licensed Content Publisher   | Elsevier                                                                                                                                |
| Licensed Content Publication | Acta Biomaterialia                                                                                                                      |
| Licensed Content Title       | A gecko skin micro/nano structure – A low adhesion, superhydrophobic, anti-wetting, self-cleaning, biocompatible, antibacterial surface |
| Licensed Content Author      | Gregory S. Watson, David W. Green, Lin Schwarzkopf, Xin Li, Bronwen W. Cribb, Sverre Myhra, Jolanta A. Watson                           |
| Licensed Content Date        | Jul 15, 2015                                                                                                                            |
| Licensed Content Volume      | 21                                                                                                                                      |
| Licensed Content Issue       | n/a                                                                                                                                     |
| Licensed Content Pages       | 14                                                                                                                                      |

**About Your Work**

|                           |                                                                                                                                      |
|---------------------------|--------------------------------------------------------------------------------------------------------------------------------------|
| Title of new article      | Recent Advances in Superhydrophobic & Antibacterial Cellulose-based Fibers and Fabrics: Bio-Inspiration, Strategies and Applications |
| Lead author               | Hua Zhou                                                                                                                             |
| Title of targeted journal | Advanced Fiber Materials                                                                                                             |
| Publisher                 | Springer Nature                                                                                                                      |
| Expected publication date | Mar 2023                                                                                                                             |

**Requestor Location**

|                    |                                                       |
|--------------------|-------------------------------------------------------|
| Requestor Location | Qing Dao University<br>Qingdao University             |
|                    | Qing Dao, other<br>China<br>Attn: Qing Dao University |

**Price**

|       |          |
|-------|----------|
| Total | 0.00 USD |
|-------|----------|

[Printable Details](#)

**Order Details**

|                                              |                                |
|----------------------------------------------|--------------------------------|
| Type of Use                                  | reuse in a journal/magazine    |
| Requestor type                               | academic/educational institute |
| Portion                                      | figures/tables/illustrations   |
| Number of figures/tables/illustrations       | 4                              |
| Format                                       | electronic                     |
| Are you the author of this Elsevier article? | Yes                            |
| Will you be translating?                     | No                             |

**Additional Data**

|                        |                    |
|------------------------|--------------------|
| Order reference number | Figure 5           |
| Portions               | Figure 1, 2, 4, 10 |

**Tax Details**

|                  |                |
|------------------|----------------|
| Publisher Tax ID | GB 494 6272 12 |
|------------------|----------------|

Total: 0.00 USD

CLOSE WINDOW

ORDER MORE

© 2023 Copyright - All Rights Reserved | Copyright Clearance Center, Inc. | Privacy statement | Data Security and Privacy | For California Residents

Terms and Conditions Comments? We would like to hear from you. E-mail us at [customer@copyright.com](mailto:customer@copyright.com)



Figure 5a

CCC | Marketplace

Hua Zhou ▾

Cart

Help

Live Chat

Payment Details

Review Details

Confirmation Details

Thank you, your order has been placed. An email confirmation has been sent to you. Your order license details and printable licenses will be available within 24 hours. Please access Manage Account for final order details.

CUSTOMER INFORMATION

Payment by invoice: You can cancel your order until the invoice is generated by contacting customer service.

Billing Address

Prof Hua Zhou  
Qing Dao University  
Qingdao University  
Qing Dao  
China  
+86 13470894233  
670299905@qq.com

PO Number (optional)  
N/A

Customer Location

Prof Hua Zhou  
Qing Dao University  
Qingdao University  
Qing Dao  
China

Payment options  
Invoice

PENDING ORDER CONFIRMATION

Confirmation Number: Pending

Order Date: 19-Mar-2023

Print Friendly Format

Includes Publisher Terms and Conditions

1. Journal of materials chemistry. B, Materials for biology and medicine

0.00 USD

Article: Biomimetics for early stage biofouling prevention: templates from insect cuticles.

Order License ID  
ISSN  
Type of Use

Pending  
2050-7518  
Republish in a  
journal/magazine

Publisher  
Portion

Royal Society of Chemistry  
Image/photo/illustration

View Details

Print License

Total Items: 1

Total Due: 0.00 USD

Accepted: Marketplace Permissions General Terms and Conditions and any applicable Publisher Terms and Conditions

Continue Shopping

© 2023 Copyright Clearance Center | About Us | Terms & Conditions | Privacy Policy | Data Security and Privacy | For California Residents | Contact Us

Figure 5b

CCC | RightsLink

Home ▾

Help ▾

Live Chat

Sign in

Create Account

SPRINGER NATURE

Bactericidal activity of black silicon

Author: Elena P. Ivanova et al

Publication: Nature Communications

Publisher: Springer Nature

Date: Nov 26, 2013

Copyright © 2013, The Author(s)

Creative Commons

The request you have made is considered to be non-commercial/educational. As the article you have requested has been distributed under a Creative Commons license (Attribution-Noncommercial), you may reuse this material for non-commercial/educational purposes without obtaining additional permission from Springer Nature, providing that the author and the original source of publication are fully acknowledged (please see the article itself for the license version number). You may reuse this material without obtaining permission from Springer Nature, providing that the author and the original source of publication are fully acknowledged, as per the terms of the license. For license terms, please see <http://creativecommons.org/>

BACK

CLOSE WINDOW

© 2023 Copyright - All Rights Reserved | Copyright Clearance Center, Inc. | Privacy statement | Data Security and Privacy | For California Residents | Terms and ConditionsComments? We would like to hear from you. E-mail us at [customer@copyright.com](mailto:customer@copyright.com)

Figure 5c-g



Home

Help

Live Chat

Sign in

Create Account

**ACS Publications**  
Most Trusted. Most Cited. Most Read.

**Bactericidal Effects of Natural Nanotopography of Dragonfly Wing on Escherichia coli**  
Author: Chaturanga D. Bandara, Sanjleena Singh, Isaac O. Afara, et al  
Publication: Applied Materials  
Publisher: American Chemical Society  
Date: Mar 1, 2017  
Copyright © 2017, American Chemical Society

**PERMISSION/LICENSE IS GRANTED FOR YOUR ORDER AT NO CHARGE**

This type of permission/license, instead of the standard Terms and Conditions, is sent to you because no fee is being charged for your order. Please note the following:

- Permission is granted for your request in both print and electronic formats, and translations.
- If figures and/or tables were requested, they may be adapted or used in part.
- Please print this page for your records and send a copy of it to your publisher/graduate school.
- Appropriate credit for the requested material should be given as follows: "Reprinted (adapted) with permission from (COMPLETE REFERENCE CITATION). Copyright (YEAR) American Chemical Society." Insert appropriate information in place of the capitalized words.
- One-time permission is granted only for the use specified in your RightsLink request. No additional uses are granted (such as derivative works or other editions). For any uses, please submit a new request.

If credit is given to another source for the material you requested from RightsLink, permission must be obtained from that source.

BACK

CLOSE WINDOW

© 2023 Copyright - All Rights Reserved | Copyright Clearance Center, Inc. | Privacy statement | Data Security and Privacy | For California Residents  
| Terms and ConditionsComments? We would like to hear from you. E-mail us at [customer@copyright.com](mailto:customer@copyright.com)

Figure 6



Home

Help

Live Chat

Sign in

Create Account



**Bactericidal activity of black silicon**

Author: Elena P. Ivanova et al

Publication: Nature Communications

Publisher: Springer Nature

Date: Nov 26, 2013

*Copyright © 2013, The Author(s)*

**Creative Commons**

The request you have made is considered to be non-commercial/educational. As the article you have requested has been distributed under a Creative Commons license (Attribution-Noncommercial), you may reuse this material for non-commercial/educational purposes without obtaining additional permission from Springer Nature, providing that the author and the original source of publication are fully acknowledged (please see the article itself for the license version number). You may reuse this material without obtaining permission from Springer Nature, providing that the author and the original source of publication are fully acknowledged, as per the terms of the license. For license terms, please see <http://creativecommons.org/>

BACK

CLOSE WINDOW

© 2023 Copyright - All Rights Reserved | Copyright Clearance Center, Inc. | Privacy statement | Data Security and Privacy | For California Residents

Terms and ConditionsComments? We would like to hear from you. E-mail us at [customer care@copyright.com](mailto:customer care@copyright.com)

Figure 7a

CCC

RightsLink

Home

Help

Live Chat

Hua Zhou

Chemical Engineering Journal

Volume 100, 2020

Lotus-leaf-inspired hierarchical structured surface with non-fouling and mechanical bactericidal performances

Author: Rujian Jiang, Lingwan Hao, Lingjie Song, Limei Tian, Yong Fan, Jie Zhao, Chaozong Liu, Weihua Ming, Luquan Ren

Publication: Chemical Engineering Journal

Publisher: Elsevier

Date: 15 October 2020

© 2020 Published by Elsevier B.V.

Order Completed

Thank you for your order.

This Agreement between Qing Dao University -- Hua Zhou ("You") and Elsevier ("Elsevier") consists of your license details and the terms and conditions provided by Elsevier and Copyright Clearance Center.

Your confirmation email will contain your order number for future reference.

License Number

5512400317755

Printable Details

License date

Mar 19, 2023

Licensed Content

Licensed Content Publisher

Elsevier

Licensed Content Publication

Chemical Engineering Journal

Licensed Content Title

Lotus-leaf-inspired hierarchical structured surface with non-fouling and mechanical bactericidal performances

Licensed Content Author

Rujian Jiang, Lingwan Hao, Lingjie Song, Limei Tian, Yong Fan, Jie Zhao, Chaozong Liu, Weihua Ming, Luquan Ren

Licensed Content Date

Oct 15, 2020

Licensed Content Volume

398

Licensed Content Issue

n/a

Licensed Content Pages

1

Order Details

Type of Use

reuse in a journal/magazine

Requestor type

academic/educational institute

Portion

figures/tables/illustrations

Number of figures/tables/illustrations

1

Format

electronic

Are you the author of this Elsevier article?

Yes

Will you be translating?

No

About Your Work

Title of new article

Recent Advances in Superhydrophobic & Antibacterial Cellulose-based Fibers and Fabrics: Bio-Inspiration, Strategies and Applications

Lead author

Hua Zhou

Title of targeted journal

Advanced Fiber Materials

Publisher

Springer Nature

Expected publication date

Mar 2023

Additional Data

Order reference number

Figure 8

Portions

Figure 1

Requestor Location

Qing Dao University

Qingdao University

Requestor Location

Qing Dao, other China  
Attn: Qing Dao University

Price

Total

0.00 USD

Total: 0.00 USD

CLOSE WINDOW

ORDER MORE

© 2023 Copyright - All Rights Reserved | Copyright Clearance Center, Inc. | Privacy statement | Data Security and Privacy | For California Residents | Terms and ConditionsComments? We would like to hear from you. E-mail us at [customer@copyright.com](mailto:customer@copyright.com)

Figure 7b-d



 Home

 Help ▾

 Live Chat

 Hua Zhou ▾



**Insect Analogue to the Lotus Leaf: A Planthopper Wing Membrane Incorporating a Low-Adhesion, Nonwetting, Superhydrophobic, Bactericidal, and Biocompatible Surface**

Author: Gregory S. Watson, David W. Green, Bronwen W. Cribb, et al  
Publication: Applied Materials  
Publisher: American Chemical Society  
Date: Jul 1, 2017

Copyright © 2017, American Chemical Society

**PERMISSION/LICENSE IS GRANTED FOR YOUR ORDER AT NO CHARGE**

This type of permission/license, instead of the standard Terms and Conditions, is sent to you because no fee is being charged for your order. Please note the following:

- Permission is granted for your request in both print and electronic formats, and translations.
- If figures and/or tables were requested, they may be adapted or used in part.
- Please print this page for your records and send a copy of it to your publisher/graduate school.
- Appropriate credit for the requested material should be given as follows: "Reprinted (adapted) with permission from (COMPLETE REFERENCE CITATION). Copyright (YEAR) American Chemical Society." Insert appropriate information in place of the capitalized words.
- One-time permission is granted only for the use specified in your RightsLink request. No additional uses are granted (such as derivative works or other editions). For any uses, please submit a new request.

If credit is given to another source for the material you requested from RightsLink, permission must be obtained from that source.

[BACK](#)[CLOSE WINDOW](#)

© 2023 Copyright - All Rights Reserved | Copyright Clearance Center, Inc. | Privacy statement | Data Security and Privacy | For California Residents

| Terms and ConditionsComments? We would like to hear from you. E-mail us at [customercare@copyright.com](mailto:customercare@copyright.com)

Figure 8



[Home](#)[Help](#)[Live Chat](#)

Hua Zhou



**Insect Analogue to the Lotus Leaf: A Planthopper Wing Membrane Incorporating a Low-Adhesion, Nonwetting, Superhydrophobic, Bactericidal, and Biocompatible Surface**

Author: Gregory S. Watson, David W. Green, Bronwen W. Cribb, et al  
Publication: Applied Materials  
Publisher: American Chemical Society  
Date: Jul 1, 2017

Copyright © 2017, American Chemical Society

**PERMISSION/LICENSE IS GRANTED FOR YOUR ORDER AT NO CHARGE**

This type of permission/license, instead of the standard Terms and Conditions, is sent to you because no fee is being charged for your order. Please note the following:

- Permission is granted for your request in both print and electronic formats, and translations.
- If figures and/or tables were requested, they may be adapted or used in part.
- Please print this page for your records and send a copy of it to your publisher/graduate school.
- Appropriate credit for the requested material should be given as follows: "Reprinted (adapted) with permission from (COMPLETE REFERENCE CITATION). Copyright (YEAR) American Chemical Society." Insert appropriate information in place of the capitalized words.
- One-time permission is granted only for the use specified in your RightsLink request. No additional uses are granted (such as derivative works or other editions). For any uses, please submit a new request.

If credit is given to another source for the material you requested from RightsLink, permission must be obtained from that source.

[BACK](#)[CLOSE WINDOW](#)

© 2023 Copyright - All Rights Reserved | Copyright Clearance Center, Inc. | Privacy statement | Data Security and Privacy | For California Residents

| Terms and ConditionsComments? We would like to hear from you. E-mail us at [customer care@copyright.com](mailto:customer care@copyright.com)



Figure 9a

[Home](#)
[Help](#)
[Live Chat](#)
[Hua Zhou](#)

**Superhydrophobic cotton fabric with excellent healability fabricated by the “grafting to” method using a diblock copolymer mist**

Author: Qingbo Xu,Liwen Shen,Panpan Duan,Lei Zhang,Feiya Fu,Xiangdong Liu

Publication: Chemical Engineering Journal

Publisher: Elsevier

Date: 1 January 2020

© 2019 Elsevier B.V. All rights reserved.

### Order Completed

Thank you for your order.

This Agreement between Qing Dao University -- Hua Zhou ("You") and Elsevier ("Elsevier") consists of your license details and the terms and conditions provided by Elsevier and Copyright Clearance Center.

Your confirmation email will contain your order number for future reference.

License Number

5512410045693

License date

Mar 19, 2023

[Printable Details](#)

☒ Licensed Content

|                              |                                                                                                                                 |
|------------------------------|---------------------------------------------------------------------------------------------------------------------------------|
| Licensed Content Publisher   | Elsevier                                                                                                                        |
| Licensed Content Publication | Chemical Engineering Journal                                                                                                    |
| Licensed Content Title       | Superhydrophobic cotton fabric with excellent healability fabricated by the “grafting to” method using a diblock copolymer mist |
| Licensed Content Author      | Qingbo Xu,Liwen Shen,Panpan Duan,Lei Zhang,Feiya Fu,Xiangdong Liu                                                               |
| Licensed Content Date        | Jan 1, 2020                                                                                                                     |
| Licensed Content Volume      | 379                                                                                                                             |
| Licensed Content Issue       | n/a                                                                                                                             |
| Licensed Content Pages       | 1                                                                                                                               |

☐ Order Details

|                                              |                                |
|----------------------------------------------|--------------------------------|
| Type of Use                                  | reuse in a journal/magazine    |
| Requestor type                               | academic/educational institute |
| Portion                                      | figures/tables/illustrations   |
| Number of figures/tables/illustrations       | 1                              |
| Format                                       | electronic                     |
| Are you the author of this Elsevier article? | Yes                            |
| Will you be translating?                     | No                             |

☐ About Your Work

|                           |                                                                                                                                      |
|---------------------------|--------------------------------------------------------------------------------------------------------------------------------------|
| Title of new article      | Recent Advances in Superhydrophobic & Antibacterial Cellulose-based Fibers and Fabrics: Bio-Inspiration, Strategies and Applications |
| Lead author               | Hua Zhou                                                                                                                             |
| Title of targeted journal | Advanced Fiber Materials                                                                                                             |
| Publisher                 | Springer Nature                                                                                                                      |
| Expected publication date | Mar 2023                                                                                                                             |

☐ Additional Data

|                        |           |
|------------------------|-----------|
| Order reference number | Figure 10 |
| Portions               | Figure 2  |

☐ Requestor Location

|                    |                                                    |
|--------------------|----------------------------------------------------|
| Requestor Location | Qing Dao University<br>Qingdao University          |
| Requestor Location | Qing Dao, other China<br>Attn: Qing Dao University |

☐ Tax Details

|                  |                |
|------------------|----------------|
| Publisher Tax ID | GB 494 6272 12 |
|------------------|----------------|

**\$ Price**

|       |          |
|-------|----------|
| Total | 0.00 USD |
|-------|----------|

**Total: 0.00 USD**

CLOSE WINDOW

ORDER MORE

© 2023 Copyright - All Rights Reserved | Copyright Clearance Center, Inc. | Privacy statement | Data Security and Privacy | For California Residents | Terms and ConditionsComments? We would like to hear from you. E-mail us at [customer@copyright.com](mailto:customer@copyright.com)

Figure 9b



Home

Help

Live Chat

Hua Zhou



Fabrication of pH-responsive hydrophilic/hydrophobic Janus cotton fabric via plasma-induced graft polymerization

Author: Xiaojie Yan, Jiawei Li, Lingmin Yi

Publication: Materials Letters

Publisher: Elsevier

Date: 1 December 2017

© 2017 Elsevier B.V. All rights reserved.

Order Completed

Thank you for your order.

This Agreement between Qing Dao University -- Hua Zhou ("You") and Elsevier ("Elsevier") consists of your license details and the terms and conditions provided by Elsevier and Copyright Clearance Center.

Your confirmation email will contain your order number for future reference.

License Number

5512411057338

License date

Mar 19, 2023

Printable Details

Licensed Content

Licensed Content Publisher

Elsevier

Licensed Content Publication

Materials Letters

Licensed Content Title

Fabrication of pH-responsive hydrophilic/hydrophobic Janus cotton fabric via plasma-induced graft polymerization

Licensed Content Author

Xiaojie Yan, Jiawei Li, Lingmin Yi

Licensed Content Date

Dec 1, 2017

Licensed Content Volume

208

Licensed Content Issue

n/a

Licensed Content Pages

4

Order Details

Type of Use

reuse in a journal/magazine

Requestor type

academic/educational institute

Portion

figures/tables/illustrations

Number of figures/tables/illustrations

1

Format

electronic

Are you the author of this Elsevier article?

Yes

Will you be translating?

No

About Your Work

Title of new article

Recent Advances in Superhydrophobic & Antibacterial Cellulose-based Fibers and Fabrics: Bio-Inspiration, Strategies and Applications

Lead author

Hua Zhou

Title of targeted journal

Advanced Fiber Materials

Publisher

Springer Nature

Expected publication date

Mar 2023

Additional Data

Order reference number

Figure10

Portions

Figure 1

Requestor Location

Qing Dao University

Qingdao University

Requestor Location

Qing Dao, other

China

Attn: Qing Dao University

Tax Details

Publisher Tax ID

GB 494 6272 12

\$ Price

Total

0.00 USD

Total: 0.00 USD

CLOSE WINDOW

ORDER MORE

© 2023 Copyright - All Rights Reserved | Copyright Clearance Center, Inc. | Privacy statement | Data Security and Privacy | For California Residents | Terms and ConditionsComments? We would like to hear from you. E-mail us at [customer@copyright.com](mailto:customer@copyright.com)

Figure 10a、b

[Home](#)
[Help](#)
[Live Chat](#)
[Hua Zhou](#)

### A Waterborne Coating System for Preparing Robust, Self-healing, Superamphiphobic Surfaces

Author: Tong Lin, Zhiguang Xu, Yan Zhao, et al  
Publication: Advanced Functional Materials  
Publisher: John Wiley and Sons  
Date: Mar 6, 2017  
© 2017 WILEY-VCH Verlag GmbH & Co. KGaA, Weinheim

#### Order Completed

Thank you for your order.

This Agreement between Qing Dao University -- Hua Zhou ("You") and John Wiley and Sons ("John Wiley and Sons") consists of your license details and the terms and conditions provided by John Wiley and Sons and Copyright Clearance Center.

Your confirmation email will contain your order number for future reference.

License Number

5512421011212

[Printable Details](#)

License date

Mar 19, 2023

##### Licensed Content

|                              |                                                                                           |
|------------------------------|-------------------------------------------------------------------------------------------|
| Licensed Content Publisher   | John Wiley and Sons                                                                       |
| Licensed Content Publication | Advanced Functional Materials                                                             |
| Licensed Content Title       | A Waterborne Coating System for Preparing Robust, Self-healing, Superamphiphobic Surfaces |
| Licensed Content Author      | Tong Lin, Zhiguang Xu, Yan Zhao, et al                                                    |
| Licensed Content Date        | Mar 6, 2017                                                                               |
| Licensed Content Volume      | 27                                                                                        |
| Licensed Content Issue       | 14                                                                                        |
| Licensed Content Pages       | 8                                                                                         |

##### Order Details

|                                                                                            |                     |
|--------------------------------------------------------------------------------------------|---------------------|
| Type of use                                                                                | Journal/Magazine    |
| Requestor type                                                                             | University/Academic |
| Is the reuse sponsored by or associated with a pharmaceutical or medical products company? | no                  |
| Format                                                                                     | Electronic          |
| Portion                                                                                    | Figure/table        |
| Number of figures/tables                                                                   | 2                   |
| Will you be translating?                                                                   | No                  |
| Circulation                                                                                | 500 - 999           |

##### About Your Work

|                           |                                                                                                                                      |
|---------------------------|--------------------------------------------------------------------------------------------------------------------------------------|
| Title of new article      | Recent Advances in Superhydrophobic & Antibacterial Cellulose-based Fibers and Fabrics: Bio-Inspiration, Strategies and Applications |
| Lead author               | Hua Zhou                                                                                                                             |
| Title of targeted journal | Advanced Fiber Materials                                                                                                             |
| Publisher                 | Springer Nature                                                                                                                      |
| Expected publication date | Mar 2023                                                                                                                             |

##### Additional Data

|                        |           |
|------------------------|-----------|
| Order reference number | Figure11  |
| Portions               | Figure1,5 |

##### Requestor Location

|                    |                                                       |
|--------------------|-------------------------------------------------------|
| Requestor Location | Qing Dao University<br>Qingdao University             |
|                    | Qing Dao, other<br>China<br>Attn: Qing Dao University |

##### Tax Details

|                  |             |
|------------------|-------------|
| Publisher Tax ID | EU826007151 |
|------------------|-------------|

##### Price

|       |          |
|-------|----------|
| Total | 0.00 USD |
|-------|----------|

Would you like to purchase the full text of this article? If so, please continue on to the content ordering system located here: [Purchase PDF](#)

If you click on the buttons below or close this window, you will not be able to return to the content ordering system.

CLOSE WINDOW

ORDER MORE

Total: 0.00 USD

© 2023 Copyright - All Rights Reserved | Copyright Clearance Center, Inc. | Privacy statement | Data Security and Privacy | For California Residents | Terms and ConditionsComments? We would like to hear from you. E-mail us at [customer@copyright.com](mailto:customer@copyright.com)

Figure 10c

CCC

RightsLink

Home

Help

Live Chat

Hua Zhou



**Biomass-based superhydrophobic coating with tunable colors and excellent robustness**

Author: Jinping Ren, Furong Tao, Xifeng Lu, Hailong Zhang, Ligang Gai, Libin Liu, Haihui Jiang

Publication: Carbohydrate Polymers

Publisher: Elsevier

Date: 15 October 2021

© 2021 Elsevier Ltd. All rights reserved.

Order Completed

Thank you for your order.

This Agreement between Qing Dao University -- Hua Zhou ("You") and Elsevier ("Elsevier") consists of your license details and the terms and conditions provided by Elsevier and Copyright Clearance Center.

Your confirmation email will contain your order number for future reference.

License Number

5512421395443

[Printable Details](#)

License date

Mar 19, 2023

Licensed Content

|                              |                                                                                        |
|------------------------------|----------------------------------------------------------------------------------------|
| Licensed Content Publisher   | Elsevier                                                                               |
| Licensed Content Publication | Carbohydrate Polymers                                                                  |
| Licensed Content Title       | Biomass-based superhydrophobic coating with tunable colors and excellent robustness    |
| Licensed Content Author      | Jinping Ren, Furong Tao, Xifeng Lu, Hailong Zhang, Ligang Gai, Libin Liu, Haihui Jiang |
| Licensed Content Date        | Oct 15, 2021                                                                           |
| Licensed Content Volume      | 270                                                                                    |
| Licensed Content Issue       | n/a                                                                                    |
| Licensed Content Pages       | 1                                                                                      |

Order Details

|                                              |                                |
|----------------------------------------------|--------------------------------|
| Type of Use                                  | reuse in a journal/magazine    |
| Requestor type                               | academic/educational institute |
| Portion                                      | figures/tables/illustrations   |
| Number of figures/tables/illustrations       | 1                              |
| Format                                       | electronic                     |
| Are you the author of this Elsevier article? | Yes                            |
| Will you be translating?                     | No                             |

About Your Work

|                           |                                                                                                                                      |
|---------------------------|--------------------------------------------------------------------------------------------------------------------------------------|
| Title of new article      | Recent Advances in Superhydrophobic & Antibacterial Cellulose-based Fibers and Fabrics: Bio-Inspiration, Strategies and Applications |
| Lead author               | Hua Zhou                                                                                                                             |
| Title of targeted journal | Advanced Fiber Materials                                                                                                             |
| Publisher                 | Springer Nature                                                                                                                      |
| Expected publication date | Mar 2023                                                                                                                             |

Additional Data

|                        |          |
|------------------------|----------|
| Order reference number | Figure11 |
| Portions               | Figure1  |

Tax Details

|                  |                |
|------------------|----------------|
| Publisher Tax ID | GB 494 6272 12 |
|------------------|----------------|

Requestor Location

|                    |                                                       |
|--------------------|-------------------------------------------------------|
| Requestor Location | Qing Dao University<br>Qingdao University             |
|                    | Qing Dao, other<br>China<br>Attn: Qing Dao University |

Price

|       |          |
|-------|----------|
| Total | 0.00 USD |
|-------|----------|

Total: 0.00 USD

CLOSE WINDOW

ORDER MORE

© 2023 Copyright - All Rights Reserved | Copyright Clearance Center, Inc. | Privacy statement | Data Security and Privacy | For California Residents | Terms and ConditionsComments? We would like to hear from you. E-mail us at [customer@copyright.com](mailto:customer@copyright.com)



RightsLink

Home

Help

Live Chat

Hua Zhou

## One-pot fabrication of superhydrophobic and flame-retardant coatings on cotton fabrics via sol-gel reaction

Author: Dongmei Lin,Xingrong Zeng,Hongqiang Li,Xuejun Lai,Tongyi Wu

Publication: Journal of Colloid and Interface Science

Publisher: Elsevier

Date: 1 January 2019

© 2018 Elsevier Inc. All rights reserved.

### Order Completed

Thank you for your order.

This Agreement between Qing Dao University – Hua Zhou ("You") and Elsevier ("Elsevier") consists of your license details and the terms and conditions provided by Elsevier and Copyright Clearance Center.

Your confirmation email will contain your order number for future reference.

License Number 5512460103937

[Printable Details](#)

License date Mar 19, 2023

#### Licensed Content

Licensed Content  
Publisher Elsevier  
Licensed Content  
Publication Journal of Colloid and Interface Science  
Licensed Content Title  
One-pot fabrication of superhydrophobic and flame-retardant coatings on cotton fabrics via sol-gel reaction  
Licensed Content Author  
Dongmei Lin,Xingrong Zeng,Hongqiang Li,Xuejun Lai,Tongyi Wu  
Licensed Content Date  
Jan 1, 2019  
Licensed Content Volume  
533  
Licensed Content Issue  
n/a  
Licensed Content Pages  
9

#### Order Details

Type of Use reuse in a journal/magazine  
Requestor type academic/educational institute  
Portion figures/tables/illustrations  
Number of figures/tables/illustrations 1  
Format electronic  
Are you the author of this Elsevier article? Yes  
Will you be translating? No

#### About Your Work

Title of new article  
Recent Advances in Superhydrophobic & Antibacterial Cellulose-based Fibers and Fabrics: Bio-Inspiration, Strategies and Applications  
Lead author  
Hua Zhou  
Title of targeted journal  
Advanced Fiber Materials  
Publisher  
Springer Nature  
Expected publication date  
Mar 2023

#### Additional Data

Order reference number  
Figure12  
Portions  
Figure1

#### Requestor Location

Qing Dao University  
Qingdao University

#### Tax Details

Publisher Tax ID GB 494 6272 12

#### Requestor Location

Qing Dao, other  
China  
Attn: Qing Dao University

#### Price

Total 0.00 USD

Total: 0.00 USD

[CLOSE WINDOW](#)

[ORDER MORE](#)

© 2023 Copyright - All Rights Reserved | Copyright Clearance Center, Inc. | Privacy statement | Data Security and Privacy | For California Residents  
| Terms and ConditionsComments? We would like to hear from you. E-mail us at [customer@copyright.com](mailto:customer@copyright.com)

Figure 11b

[Home](#)
[Help](#)
[Live Chat](#)
[Hua Zhou](#)

**Construction of super-hydrophobic, highly effective flame retardant coating for cotton fabric with superior washability and abrasion resistance**  
 Author: Liangyuan Qi, Shuilai Qiu, Jianchao Xi, Bin Yu, Yuan Hu, Weiyei Xing  
 Publication: Journal of Colloid and Interface Science  
 Publisher: Elsevier  
 Date: February 2022  
 © 2021 Elsevier Inc. All rights reserved.

### Order Completed

Thank you for your order.

This Agreement between Qing Dao University -- Hua Zhou ("You") and Elsevier ("Elsevier") consists of your license details and the terms and conditions provided by Elsevier and Copyright Clearance Center.

Your confirmation email will contain your order number for future reference.

License Number

5512450047976

License date

Mar 19, 2023

[Printable Details](#)

|                                                                                                                                                                                                                                                                                                                                                                                                                                                                                                                                                                                                                                                                                                                                                                                       |                                                                                                                                                 |                                                                                                                                      |                              |                                                    |                                                                                                      |                                                                                                                                                 |                         |                                                                      |                           |             |                                                                                                                                                          |                        |                        |          |                        |    |                                                                                                                                                                                                                                                                                                                                                                                                                                                                                                                         |             |                             |                |                                |         |                              |                                        |   |        |            |                                              |     |                          |    |
|---------------------------------------------------------------------------------------------------------------------------------------------------------------------------------------------------------------------------------------------------------------------------------------------------------------------------------------------------------------------------------------------------------------------------------------------------------------------------------------------------------------------------------------------------------------------------------------------------------------------------------------------------------------------------------------------------------------------------------------------------------------------------------------|-------------------------------------------------------------------------------------------------------------------------------------------------|--------------------------------------------------------------------------------------------------------------------------------------|------------------------------|----------------------------------------------------|------------------------------------------------------------------------------------------------------|-------------------------------------------------------------------------------------------------------------------------------------------------|-------------------------|----------------------------------------------------------------------|---------------------------|-------------|----------------------------------------------------------------------------------------------------------------------------------------------------------|------------------------|------------------------|----------|------------------------|----|-------------------------------------------------------------------------------------------------------------------------------------------------------------------------------------------------------------------------------------------------------------------------------------------------------------------------------------------------------------------------------------------------------------------------------------------------------------------------------------------------------------------------|-------------|-----------------------------|----------------|--------------------------------|---------|------------------------------|----------------------------------------|---|--------|------------|----------------------------------------------|-----|--------------------------|----|
| <div>Licensed Content</div> <table> <tr> <td>Licensed Content Publisher</td> <td>Elsevier</td> </tr> <tr> <td>Licensed Content Publication</td> <td>Journal of Colloid and Interface Science</td> </tr> <tr> <td>Licensed Content Title</td> <td>Construction of super-hydrophobic, highly effective flame retardant coating for cotton fabric with superior washability and abrasion resistance</td> </tr> <tr> <td>Licensed Content Author</td> <td>Liangyuan Qi, Shuilai Qiu, Jianchao Xi, Bin Yu, Yuan Hu, Weiyei Xing</td> </tr> <tr> <td>Licensed Content Date</td> <td>Feb 1, 2022</td> </tr> <tr> <td>Licensed Content Volume</td> <td>607</td> </tr> <tr> <td>Licensed Content Issue</td> <td>n/a</td> </tr> <tr> <td>Licensed Content Pages</td> <td>10</td> </tr> </table> | Licensed Content Publisher                                                                                                                      | Elsevier                                                                                                                             | Licensed Content Publication | Journal of Colloid and Interface Science           | Licensed Content Title                                                                               | Construction of super-hydrophobic, highly effective flame retardant coating for cotton fabric with superior washability and abrasion resistance | Licensed Content Author | Liangyuan Qi, Shuilai Qiu, Jianchao Xi, Bin Yu, Yuan Hu, Weiyei Xing | Licensed Content Date     | Feb 1, 2022 | Licensed Content Volume                                                                                                                                  | 607                    | Licensed Content Issue | n/a      | Licensed Content Pages | 10 | <div>Order Details</div> <table> <tr> <td>Type of Use</td> <td>reuse in a journal/magazine</td> </tr> <tr> <td>Requestor type</td> <td>academic/educational institute</td> </tr> <tr> <td>Portion</td> <td>figures/tables/illustrations</td> </tr> <tr> <td>Number of figures/tables/illustrations</td> <td>1</td> </tr> <tr> <td>Format</td> <td>electronic</td> </tr> <tr> <td>Are you the author of this Elsevier article?</td> <td>Yes</td> </tr> <tr> <td>Will you be translating?</td> <td>No</td> </tr> </table> | Type of Use | reuse in a journal/magazine | Requestor type | academic/educational institute | Portion | figures/tables/illustrations | Number of figures/tables/illustrations | 1 | Format | electronic | Are you the author of this Elsevier article? | Yes | Will you be translating? | No |
| Licensed Content Publisher                                                                                                                                                                                                                                                                                                                                                                                                                                                                                                                                                                                                                                                                                                                                                            | Elsevier                                                                                                                                        |                                                                                                                                      |                              |                                                    |                                                                                                      |                                                                                                                                                 |                         |                                                                      |                           |             |                                                                                                                                                          |                        |                        |          |                        |    |                                                                                                                                                                                                                                                                                                                                                                                                                                                                                                                         |             |                             |                |                                |         |                              |                                        |   |        |            |                                              |     |                          |    |
| Licensed Content Publication                                                                                                                                                                                                                                                                                                                                                                                                                                                                                                                                                                                                                                                                                                                                                          | Journal of Colloid and Interface Science                                                                                                        |                                                                                                                                      |                              |                                                    |                                                                                                      |                                                                                                                                                 |                         |                                                                      |                           |             |                                                                                                                                                          |                        |                        |          |                        |    |                                                                                                                                                                                                                                                                                                                                                                                                                                                                                                                         |             |                             |                |                                |         |                              |                                        |   |        |            |                                              |     |                          |    |
| Licensed Content Title                                                                                                                                                                                                                                                                                                                                                                                                                                                                                                                                                                                                                                                                                                                                                                | Construction of super-hydrophobic, highly effective flame retardant coating for cotton fabric with superior washability and abrasion resistance |                                                                                                                                      |                              |                                                    |                                                                                                      |                                                                                                                                                 |                         |                                                                      |                           |             |                                                                                                                                                          |                        |                        |          |                        |    |                                                                                                                                                                                                                                                                                                                                                                                                                                                                                                                         |             |                             |                |                                |         |                              |                                        |   |        |            |                                              |     |                          |    |
| Licensed Content Author                                                                                                                                                                                                                                                                                                                                                                                                                                                                                                                                                                                                                                                                                                                                                               | Liangyuan Qi, Shuilai Qiu, Jianchao Xi, Bin Yu, Yuan Hu, Weiyei Xing                                                                            |                                                                                                                                      |                              |                                                    |                                                                                                      |                                                                                                                                                 |                         |                                                                      |                           |             |                                                                                                                                                          |                        |                        |          |                        |    |                                                                                                                                                                                                                                                                                                                                                                                                                                                                                                                         |             |                             |                |                                |         |                              |                                        |   |        |            |                                              |     |                          |    |
| Licensed Content Date                                                                                                                                                                                                                                                                                                                                                                                                                                                                                                                                                                                                                                                                                                                                                                 | Feb 1, 2022                                                                                                                                     |                                                                                                                                      |                              |                                                    |                                                                                                      |                                                                                                                                                 |                         |                                                                      |                           |             |                                                                                                                                                          |                        |                        |          |                        |    |                                                                                                                                                                                                                                                                                                                                                                                                                                                                                                                         |             |                             |                |                                |         |                              |                                        |   |        |            |                                              |     |                          |    |
| Licensed Content Volume                                                                                                                                                                                                                                                                                                                                                                                                                                                                                                                                                                                                                                                                                                                                                               | 607                                                                                                                                             |                                                                                                                                      |                              |                                                    |                                                                                                      |                                                                                                                                                 |                         |                                                                      |                           |             |                                                                                                                                                          |                        |                        |          |                        |    |                                                                                                                                                                                                                                                                                                                                                                                                                                                                                                                         |             |                             |                |                                |         |                              |                                        |   |        |            |                                              |     |                          |    |
| Licensed Content Issue                                                                                                                                                                                                                                                                                                                                                                                                                                                                                                                                                                                                                                                                                                                                                                | n/a                                                                                                                                             |                                                                                                                                      |                              |                                                    |                                                                                                      |                                                                                                                                                 |                         |                                                                      |                           |             |                                                                                                                                                          |                        |                        |          |                        |    |                                                                                                                                                                                                                                                                                                                                                                                                                                                                                                                         |             |                             |                |                                |         |                              |                                        |   |        |            |                                              |     |                          |    |
| Licensed Content Pages                                                                                                                                                                                                                                                                                                                                                                                                                                                                                                                                                                                                                                                                                                                                                                | 10                                                                                                                                              |                                                                                                                                      |                              |                                                    |                                                                                                      |                                                                                                                                                 |                         |                                                                      |                           |             |                                                                                                                                                          |                        |                        |          |                        |    |                                                                                                                                                                                                                                                                                                                                                                                                                                                                                                                         |             |                             |                |                                |         |                              |                                        |   |        |            |                                              |     |                          |    |
| Type of Use                                                                                                                                                                                                                                                                                                                                                                                                                                                                                                                                                                                                                                                                                                                                                                           | reuse in a journal/magazine                                                                                                                     |                                                                                                                                      |                              |                                                    |                                                                                                      |                                                                                                                                                 |                         |                                                                      |                           |             |                                                                                                                                                          |                        |                        |          |                        |    |                                                                                                                                                                                                                                                                                                                                                                                                                                                                                                                         |             |                             |                |                                |         |                              |                                        |   |        |            |                                              |     |                          |    |
| Requestor type                                                                                                                                                                                                                                                                                                                                                                                                                                                                                                                                                                                                                                                                                                                                                                        | academic/educational institute                                                                                                                  |                                                                                                                                      |                              |                                                    |                                                                                                      |                                                                                                                                                 |                         |                                                                      |                           |             |                                                                                                                                                          |                        |                        |          |                        |    |                                                                                                                                                                                                                                                                                                                                                                                                                                                                                                                         |             |                             |                |                                |         |                              |                                        |   |        |            |                                              |     |                          |    |
| Portion                                                                                                                                                                                                                                                                                                                                                                                                                                                                                                                                                                                                                                                                                                                                                                               | figures/tables/illustrations                                                                                                                    |                                                                                                                                      |                              |                                                    |                                                                                                      |                                                                                                                                                 |                         |                                                                      |                           |             |                                                                                                                                                          |                        |                        |          |                        |    |                                                                                                                                                                                                                                                                                                                                                                                                                                                                                                                         |             |                             |                |                                |         |                              |                                        |   |        |            |                                              |     |                          |    |
| Number of figures/tables/illustrations                                                                                                                                                                                                                                                                                                                                                                                                                                                                                                                                                                                                                                                                                                                                                | 1                                                                                                                                               |                                                                                                                                      |                              |                                                    |                                                                                                      |                                                                                                                                                 |                         |                                                                      |                           |             |                                                                                                                                                          |                        |                        |          |                        |    |                                                                                                                                                                                                                                                                                                                                                                                                                                                                                                                         |             |                             |                |                                |         |                              |                                        |   |        |            |                                              |     |                          |    |
| Format                                                                                                                                                                                                                                                                                                                                                                                                                                                                                                                                                                                                                                                                                                                                                                                | electronic                                                                                                                                      |                                                                                                                                      |                              |                                                    |                                                                                                      |                                                                                                                                                 |                         |                                                                      |                           |             |                                                                                                                                                          |                        |                        |          |                        |    |                                                                                                                                                                                                                                                                                                                                                                                                                                                                                                                         |             |                             |                |                                |         |                              |                                        |   |        |            |                                              |     |                          |    |
| Are you the author of this Elsevier article?                                                                                                                                                                                                                                                                                                                                                                                                                                                                                                                                                                                                                                                                                                                                          | Yes                                                                                                                                             |                                                                                                                                      |                              |                                                    |                                                                                                      |                                                                                                                                                 |                         |                                                                      |                           |             |                                                                                                                                                          |                        |                        |          |                        |    |                                                                                                                                                                                                                                                                                                                                                                                                                                                                                                                         |             |                             |                |                                |         |                              |                                        |   |        |            |                                              |     |                          |    |
| Will you be translating?                                                                                                                                                                                                                                                                                                                                                                                                                                                                                                                                                                                                                                                                                                                                                              | No                                                                                                                                              |                                                                                                                                      |                              |                                                    |                                                                                                      |                                                                                                                                                 |                         |                                                                      |                           |             |                                                                                                                                                          |                        |                        |          |                        |    |                                                                                                                                                                                                                                                                                                                                                                                                                                                                                                                         |             |                             |                |                                |         |                              |                                        |   |        |            |                                              |     |                          |    |
| <div>About Your Work</div> <table> <tr> <td>Title of new article</td> <td>Recent Advances in Superhydrophobic &amp; Antibacterial Cellulose-based Fibers and Fabrics: Bio-Inspiration, Strategies and Applications</td> </tr> <tr> <td>Lead author</td> <td>Hua Zhou</td> </tr> <tr> <td>Title of targeted journal</td> <td>Advanced Fiber Materials</td> </tr> <tr> <td>Publisher</td> <td>Springer Nature</td> </tr> <tr> <td>Expected publication date</td> <td>Mar 2023</td> </tr> </table>                                                                                                                                                                                                                                                                                       | Title of new article                                                                                                                            | Recent Advances in Superhydrophobic & Antibacterial Cellulose-based Fibers and Fabrics: Bio-Inspiration, Strategies and Applications | Lead author                  | Hua Zhou                                           | Title of targeted journal                                                                            | Advanced Fiber Materials                                                                                                                        | Publisher               | Springer Nature                                                      | Expected publication date | Mar 2023    | <div>Additional Data</div> <table> <tr> <td>Order reference number</td> <td>Figure12</td> </tr> <tr> <td>Portions</td> <td>Scheme 1.</td> </tr> </table> | Order reference number | Figure12               | Portions | Scheme 1.              |    |                                                                                                                                                                                                                                                                                                                                                                                                                                                                                                                         |             |                             |                |                                |         |                              |                                        |   |        |            |                                              |     |                          |    |
| Title of new article                                                                                                                                                                                                                                                                                                                                                                                                                                                                                                                                                                                                                                                                                                                                                                  | Recent Advances in Superhydrophobic & Antibacterial Cellulose-based Fibers and Fabrics: Bio-Inspiration, Strategies and Applications            |                                                                                                                                      |                              |                                                    |                                                                                                      |                                                                                                                                                 |                         |                                                                      |                           |             |                                                                                                                                                          |                        |                        |          |                        |    |                                                                                                                                                                                                                                                                                                                                                                                                                                                                                                                         |             |                             |                |                                |         |                              |                                        |   |        |            |                                              |     |                          |    |
| Lead author                                                                                                                                                                                                                                                                                                                                                                                                                                                                                                                                                                                                                                                                                                                                                                           | Hua Zhou                                                                                                                                        |                                                                                                                                      |                              |                                                    |                                                                                                      |                                                                                                                                                 |                         |                                                                      |                           |             |                                                                                                                                                          |                        |                        |          |                        |    |                                                                                                                                                                                                                                                                                                                                                                                                                                                                                                                         |             |                             |                |                                |         |                              |                                        |   |        |            |                                              |     |                          |    |
| Title of targeted journal                                                                                                                                                                                                                                                                                                                                                                                                                                                                                                                                                                                                                                                                                                                                                             | Advanced Fiber Materials                                                                                                                        |                                                                                                                                      |                              |                                                    |                                                                                                      |                                                                                                                                                 |                         |                                                                      |                           |             |                                                                                                                                                          |                        |                        |          |                        |    |                                                                                                                                                                                                                                                                                                                                                                                                                                                                                                                         |             |                             |                |                                |         |                              |                                        |   |        |            |                                              |     |                          |    |
| Publisher                                                                                                                                                                                                                                                                                                                                                                                                                                                                                                                                                                                                                                                                                                                                                                             | Springer Nature                                                                                                                                 |                                                                                                                                      |                              |                                                    |                                                                                                      |                                                                                                                                                 |                         |                                                                      |                           |             |                                                                                                                                                          |                        |                        |          |                        |    |                                                                                                                                                                                                                                                                                                                                                                                                                                                                                                                         |             |                             |                |                                |         |                              |                                        |   |        |            |                                              |     |                          |    |
| Expected publication date                                                                                                                                                                                                                                                                                                                                                                                                                                                                                                                                                                                                                                                                                                                                                             | Mar 2023                                                                                                                                        |                                                                                                                                      |                              |                                                    |                                                                                                      |                                                                                                                                                 |                         |                                                                      |                           |             |                                                                                                                                                          |                        |                        |          |                        |    |                                                                                                                                                                                                                                                                                                                                                                                                                                                                                                                         |             |                             |                |                                |         |                              |                                        |   |        |            |                                              |     |                          |    |
| Order reference number                                                                                                                                                                                                                                                                                                                                                                                                                                                                                                                                                                                                                                                                                                                                                                | Figure12                                                                                                                                        |                                                                                                                                      |                              |                                                    |                                                                                                      |                                                                                                                                                 |                         |                                                                      |                           |             |                                                                                                                                                          |                        |                        |          |                        |    |                                                                                                                                                                                                                                                                                                                                                                                                                                                                                                                         |             |                             |                |                                |         |                              |                                        |   |        |            |                                              |     |                          |    |
| Portions                                                                                                                                                                                                                                                                                                                                                                                                                                                                                                                                                                                                                                                                                                                                                                              | Scheme 1.                                                                                                                                       |                                                                                                                                      |                              |                                                    |                                                                                                      |                                                                                                                                                 |                         |                                                                      |                           |             |                                                                                                                                                          |                        |                        |          |                        |    |                                                                                                                                                                                                                                                                                                                                                                                                                                                                                                                         |             |                             |                |                                |         |                              |                                        |   |        |            |                                              |     |                          |    |
| <div>Requestor Location</div> <table> <tr> <td>Requestor Location</td> <td>Qing Dao University<br/>Qingdao University</td> </tr> <tr> <td></td> <td>Qing Dao, other China<br/>Attn: Qing Dao University</td> </tr> </table>                                                                                                                                                                                                                                                                                                                                                                                                                                                                                                                                                           | Requestor Location                                                                                                                              | Qing Dao University<br>Qingdao University                                                                                            |                              | Qing Dao, other China<br>Attn: Qing Dao University | <div>Tax Details</div> <table> <tr> <td>Publisher Tax ID</td> <td>GB 494 6272 12</td> </tr> </table> | Publisher Tax ID                                                                                                                                | GB 494 6272 12          |                                                                      |                           |             |                                                                                                                                                          |                        |                        |          |                        |    |                                                                                                                                                                                                                                                                                                                                                                                                                                                                                                                         |             |                             |                |                                |         |                              |                                        |   |        |            |                                              |     |                          |    |
| Requestor Location                                                                                                                                                                                                                                                                                                                                                                                                                                                                                                                                                                                                                                                                                                                                                                    | Qing Dao University<br>Qingdao University                                                                                                       |                                                                                                                                      |                              |                                                    |                                                                                                      |                                                                                                                                                 |                         |                                                                      |                           |             |                                                                                                                                                          |                        |                        |          |                        |    |                                                                                                                                                                                                                                                                                                                                                                                                                                                                                                                         |             |                             |                |                                |         |                              |                                        |   |        |            |                                              |     |                          |    |
|                                                                                                                                                                                                                                                                                                                                                                                                                                                                                                                                                                                                                                                                                                                                                                                       | Qing Dao, other China<br>Attn: Qing Dao University                                                                                              |                                                                                                                                      |                              |                                                    |                                                                                                      |                                                                                                                                                 |                         |                                                                      |                           |             |                                                                                                                                                          |                        |                        |          |                        |    |                                                                                                                                                                                                                                                                                                                                                                                                                                                                                                                         |             |                             |                |                                |         |                              |                                        |   |        |            |                                              |     |                          |    |
| Publisher Tax ID                                                                                                                                                                                                                                                                                                                                                                                                                                                                                                                                                                                                                                                                                                                                                                      | GB 494 6272 12                                                                                                                                  |                                                                                                                                      |                              |                                                    |                                                                                                      |                                                                                                                                                 |                         |                                                                      |                           |             |                                                                                                                                                          |                        |                        |          |                        |    |                                                                                                                                                                                                                                                                                                                                                                                                                                                                                                                         |             |                             |                |                                |         |                              |                                        |   |        |            |                                              |     |                          |    |
| <div>\$ Price</div> <table> <tr> <td>Total</td> <td>0.00 USD</td> </tr> </table>                                                                                                                                                                                                                                                                                                                                                                                                                                                                                                                                                                                                                                                                                                      | Total                                                                                                                                           | 0.00 USD                                                                                                                             | <div>Total: 0.00 USD</div>   |                                                    |                                                                                                      |                                                                                                                                                 |                         |                                                                      |                           |             |                                                                                                                                                          |                        |                        |          |                        |    |                                                                                                                                                                                                                                                                                                                                                                                                                                                                                                                         |             |                             |                |                                |         |                              |                                        |   |        |            |                                              |     |                          |    |
| Total                                                                                                                                                                                                                                                                                                                                                                                                                                                                                                                                                                                                                                                                                                                                                                                 | 0.00 USD                                                                                                                                        |                                                                                                                                      |                              |                                                    |                                                                                                      |                                                                                                                                                 |                         |                                                                      |                           |             |                                                                                                                                                          |                        |                        |          |                        |    |                                                                                                                                                                                                                                                                                                                                                                                                                                                                                                                         |             |                             |                |                                |         |                              |                                        |   |        |            |                                              |     |                          |    |

CLOSE WINDOW

ORDER MORE

© 2023 Copyright - All Rights Reserved | Copyright Clearance Center, Inc. | Privacy statement | Data Security and Privacy | For California Residents

Terms and ConditionsComments? We would like to hear from you. E-mail us at [customer@copyright.com](mailto:customer@copyright.com)



Figure 12a

[Home](#)
[Help](#)
[Live Chat](#)
[Hua Zhou](#)

**Superhydrophobic and UV-blocking cotton fabrics prepared by layer-by-layer assembly of organic UV absorber intercalated layered double hydroxides**  
 Author: Yan Zhao,Zhiguang Xu,Xungai Wang,Tong Lin  
 Publication: Applied Surface Science  
 Publisher: Elsevier  
 Date: 1 December 2013  
 Copyright © 2013 Elsevier B.V. All rights reserved.

### Order Completed

Thank you for your order.

This Agreement between Qing Dao University -- Hua Zhou ("You") and Elsevier ("Elsevier") consists of your license details and the terms and conditions provided by Elsevier and Copyright Clearance Center.

Your confirmation email will contain your order number for future reference.

License Number

5512460804700

License date

Mar 19, 2023

[Printable Details](#)

☒ Licensed Content

|                              |                                                                                                                                                   |
|------------------------------|---------------------------------------------------------------------------------------------------------------------------------------------------|
| Licensed Content Publisher   | Elsevier                                                                                                                                          |
| Licensed Content Publication | Applied Surface Science                                                                                                                           |
| Licensed Content Title       | Superhydrophobic and UV-blocking cotton fabrics prepared by layer-by-layer assembly of organic UV absorber intercalated layered double hydroxides |
| Licensed Content Author      | Yan Zhao,Zhiguang Xu,Xungai Wang,Tong Lin                                                                                                         |
| Licensed Content Date        | Dec 1, 2013                                                                                                                                       |
| Licensed Content Volume      | 286                                                                                                                                               |
| Licensed Content Issue       | n/a                                                                                                                                               |
| Licensed Content Pages       | 7                                                                                                                                                 |

☐ Order Details

|                                              |                                |
|----------------------------------------------|--------------------------------|
| Type of Use                                  | reuse in a journal/magazine    |
| Requestor type                               | academic/educational institute |
| Portion                                      | figures/tables/illustrations   |
| Number of figures/tables/illustrations       | 1                              |
| Format                                       | electronic                     |
| Are you the author of this Elsevier article? | Yes                            |
| Will you be translating?                     | No                             |

☐ About Your Work

|                           |                                                                                                                                      |
|---------------------------|--------------------------------------------------------------------------------------------------------------------------------------|
| Title of new article      | Recent Advances in Superhydrophobic & Antibacterial Cellulose-based Fibers and Fabrics: Bio-Inspiration, Strategies and Applications |
| Lead author               | Hua Zhou                                                                                                                             |
| Title of targeted journal | Advanced Fiber Materials                                                                                                             |
| Publisher                 | Springer Nature                                                                                                                      |
| Expected publication date | Mar 2023                                                                                                                             |

☐ Additional Data

|                        |          |
|------------------------|----------|
| Order reference number | Figure13 |
| Portions               | Scheme 1 |

☐ Requestor Location

|                    |                                                    |
|--------------------|----------------------------------------------------|
| Requestor Location | Qing Dao University<br>Qingdao University          |
| Requestor Location | Qing Dao, other China<br>Attn: Qing Dao University |

☐ Tax Details

|                  |                |
|------------------|----------------|
| Publisher Tax ID | GB 494 6272 12 |
|------------------|----------------|

**\$ Price**

|       |          |
|-------|----------|
| Total | 0.00 USD |
|-------|----------|

**Total: 0.00 USD**

[CLOSE WINDOW](#)
[ORDER MORE](#)

© 2023 Copyright - All Rights Reserved | Copyright Clearance Center, Inc. | Privacy statement | Data Security and Privacy | For California Residents  
 Terms and ConditionsComments? We would like to hear from you. E-mail us at [customer@copyright.com](mailto:customer@copyright.com)

Figure 12b

[Home](#) [Help](#) [Live Chat](#) [Hua Zhou](#)

### Durable, Highly Electrically Conductive Cotton Fabrics with Healable Superamphiphobicity

Author: Xiang Li, Yang Li, Tingting Guan, et al  
Publication: Applied Materials  
Publisher: American Chemical Society  
Date: Apr 1, 2018  
Copyright © 2018, American Chemical Society

**PERMISSION/LICENSE IS GRANTED FOR YOUR ORDER AT NO CHARGE**

This type of permission/license, instead of the standard Terms and Conditions, is sent to you because no fee is being charged for your order. Please note the following:

- Permission is granted for your request in both print and electronic formats, and translations.
- If figures and/or tables were requested, they may be adapted or used in part.
- Please print this page for your records and send a copy of it to your publisher/graduate school.
- Appropriate credit for the requested material should be given as follows: "Reprinted (adapted) with permission from (COMPLETE REFERENCE CITATION). Copyright (YEAR) American Chemical Society." Insert appropriate information in place of the capitalized words.
- One-time permission is granted only for the use specified in your RightsLink request. No additional uses are granted (such as derivative works or other editions). For any uses, please submit a new request.

If credit is given to another source for the material you requested from RightsLink, permission must be obtained from that source.

[BACK](#) [CLOSE WINDOW](#)

© 2023 Copyright - All Rights Reserved | Copyright Clearance Center, Inc. | Privacy statement | Data Security and Privacy | For California Residents  
Terms and Conditions/Comments? We would like to hear from you. E-mail us at [customercare@copyright.com](mailto:customercare@copyright.com)

Figure 12c

[Home](#) [Help](#) [Live Chat](#) [Hua Zhou](#)

### A novel strategy for fabricating robust superhydrophobic fabrics by environmentally-friendly enzyme etching

Author: Yan Cheng,Tianxue Zhu,Shuhui Li,Jianying Huang,Jiajun Mao,Hui Yang,Shouwei Gao,Zhong Chen,Yuekun Lai  
Publication: Chemical Engineering Journal  
Publisher: Elsevier  
Date: 1 January 2019  
© 2018 Elsevier B.V. All rights reserved.

**Order Completed**

Thank you for your order.

This Agreement between Qing Dao University – Hua Zhou ("You") and Elsevier ("Elsevier") consists of your license details and the terms and conditions provided by Elsevier and Copyright Clearance Center.

Your confirmation email will contain your order number for future reference.

|                              |                                                                                                                                      |                                   |
|------------------------------|--------------------------------------------------------------------------------------------------------------------------------------|-----------------------------------|
| License Number               | 5512461487387                                                                                                                        | <a href="#">Printable Details</a> |
| License date                 | Mar 19, 2023                                                                                                                         |                                   |
| <b>Licensed Content</b>      |                                                                                                                                      |                                   |
| Licensed Content Publisher   | Elsevier                                                                                                                             |                                   |
| Licensed Content Publication | Chemical Engineering Journal                                                                                                         |                                   |
| Licensed Content Title       | A novel strategy for fabricating robust superhydrophobic fabrics by environmentally-friendly enzyme etching                          |                                   |
| Licensed Content Author      | Yan Cheng,Tianxue Zhu,Shuhui Li,Jianying Huang,Jiajun Mao,Hui Yang,Shouwei Gao,Zhong Chen,Yuekun Lai                                 |                                   |
| Licensed Content Date        | Jan 1, 2019                                                                                                                          |                                   |
| Licensed Content Volume      | 355                                                                                                                                  |                                   |
| Licensed Content Issue       | n/a                                                                                                                                  |                                   |
| Licensed Content Pages       | 9                                                                                                                                    |                                   |
| <b>About Your Work</b>       |                                                                                                                                      |                                   |
| Title of new article         | Recent Advances in Superhydrophobic & Antibacterial Cellulose-based Fibers and Fabrics: Bio-inspiration, Strategies and Applications |                                   |
| Lead author                  | Hua Zhou                                                                                                                             |                                   |
| Title of targeted journal    | Advanced Fiber Materials                                                                                                             |                                   |
| Publisher                    | Springer Nature                                                                                                                      |                                   |
| Expected publication date    | Mar 2023                                                                                                                             |                                   |
| <b>Requestor Location</b>    |                                                                                                                                      |                                   |
|                              | Qing Dao University<br>Qingdao University                                                                                            |                                   |
| Requestor Location           | Qing Dao, other China<br>Attn: Qing Dao University                                                                                   |                                   |
| <b>Price</b>                 |                                                                                                                                      |                                   |
| Total                        | 0.00 USD                                                                                                                             |                                   |

|                                              |                                |
|----------------------------------------------|--------------------------------|
| <b>Order Details</b>                         |                                |
| Type of Use                                  | reuse in a journal/magazine    |
| Requestor type                               | academic/educational institute |
| Portion                                      | figures/tables/illustrations   |
| Number of figures/tables/illustrations       | 1                              |
| Format                                       | electronic                     |
| Are you the author of this Elsevier article? | Yes                            |
| Will you be translating?                     | No                             |
| <b>Additional Data</b>                       |                                |
| Order reference number                       | Figure13                       |
| Portions                                     | Scheme 1                       |
| <b>Tax Details</b>                           |                                |
| Publisher Tax ID                             | GB 494 6272 12                 |

[CLOSE WINDOW](#)

Total: 0.00 USD  
[ORDER MORE](#)

© 2023 Copyright - All Rights Reserved | Copyright Clearance Center, Inc. | Privacy statement | Data Security and Privacy | For California Residents  
Terms and Conditions/Comments? We would like to hear from you. E-mail us at [customercare@copyright.com](mailto:customercare@copyright.com)

Figure 13

[Home](#)
[Help](#)
[Live Chat](#)
[Hua Zhou](#)

Cell adhesive spectra along surface wettability gradient from superhydrophilicity to superhydrophobicity

Author: Jingxin Meng et al

Publication: Science China Chemistry

Publisher: Springer Nature

Date: Apr 7, 2017

Copyright © 2017, Science China Press and Springer-Verlag Berlin Heidelberg

### Order Completed

Thank you for your order.

This Agreement between Qing Dao University -- Hua Zhou ("You") and Springer Nature ("Springer Nature") consists of your license details and the terms and conditions provided by Springer Nature and Copyright Clearance Center.

Your confirmation email will contain your order number for future reference.

[Printable Details](#)

|                |               |
|----------------|---------------|
| License Number | 5512350017565 |
| License date   | Mar 19, 2023  |

Licensed Content

|                              |                                                                                                          |
|------------------------------|----------------------------------------------------------------------------------------------------------|
| Licensed Content Publisher   | Springer Nature                                                                                          |
| Licensed Content Publication | Science China Chemistry                                                                                  |
| Licensed Content Title       | Cell adhesive spectra along surface wettability gradient from superhydrophilicity to superhydrophobicity |
| Licensed Content Author      | Jingxin Meng et al                                                                                       |
| Licensed Content Date        | Apr 7, 2017                                                                                              |

Order Details

|                                                                                               |                                           |
|-----------------------------------------------------------------------------------------------|-------------------------------------------|
| Type of Use                                                                                   | Journal/Magazine                          |
| Requestor type                                                                                | academic/university or research institute |
| Is this reuse sponsored by or associated with a pharmaceutical or a medical products company? | no                                        |
| Format                                                                                        | electronic                                |
| Portion                                                                                       | figures/tables/illustrations              |
| Number of figures/tables/illustrations                                                        | 3                                         |
| Will you be translating?                                                                      | no                                        |
| Circulation/distribution                                                                      | 500 - 999                                 |
| Author of this Springer Nature content                                                        | yes                                       |
| Publishing Open Access                                                                        | Yes                                       |
| Creative Commons License                                                                      | CC-BY                                     |

About Your Work

|                           |                                                                                                                                      |
|---------------------------|--------------------------------------------------------------------------------------------------------------------------------------|
| Title of new article      | Recent Advances in Superhydrophobic & Antibacterial Cellulose-based Fibers and Fabrics: Bio-Inspiration, Strategies and Applications |
| Lead author               | Hua Zhou                                                                                                                             |
| Title of targeted journal | Advanced Fiber Materials                                                                                                             |
| Publisher                 | Springer Nature                                                                                                                      |
| Expected publication date | Mar 2023                                                                                                                             |

Requestor Location

|                    |                                                       |
|--------------------|-------------------------------------------------------|
| Requestor Location | Qing Dao University<br>Qingdao University             |
|                    | Qing Dao, other<br>China<br>Attn: Qing Dao University |

Additional Data

|                        |            |
|------------------------|------------|
| Order reference number | Figure 2   |
| Portions               | Figure 1,3 |

Tax Details

Price

|       |          |
|-------|----------|
| Total | 0.00 USD |
|-------|----------|

Total: 0.00 USD

CLOSE WINDOW

ORDER MORE

© 2023 Copyright - All Rights Reserved | Copyright Clearance Center, Inc. | Privacy statement | Data Security and Privacy | For California Residents | Terms and ConditionsComments? We would like to hear from you. E-mail us at [customer@copyright.com](mailto:customer@copyright.com)

Figure 14

[Home](#)
[Help](#)
[Live Chat](#)
[Hua Zhou](#)

### Recent Advances in Antibacterial Superhydrophobic Coatings

Author: Wen Li, Abdul Rahim Siddiqui, Alidad Amirfazli, et al

Publication: Advanced Engineering Materials

Publisher: John Wiley and Sons

Date: Oct 28, 2021

© 2021 Wiley-VCH GmbH

#### Order Completed

Thank you for your order.

This Agreement between Qing Dao University -- Hua Zhou ("You") and John Wiley and Sons ("John Wiley and Sons") consists of your license details and the terms and conditions provided by John Wiley and Sons and Copyright Clearance Center.

Your confirmation email will contain your order number for future reference.

License Number

5512470699996

License date

Mar 19, 2023

☒ Licensed Content

|                              |                                                            |
|------------------------------|------------------------------------------------------------|
| Licensed Content Publisher   | John Wiley and Sons                                        |
| Licensed Content Publication | Advanced Engineering Materials                             |
| Licensed Content Title       | Recent Advances in Antibacterial Superhydrophobic Coatings |
| Licensed Content Author      | Wen Li, Abdul Rahim Siddiqui, Alidad Amirfazli, et al      |
| Licensed Content Date        | Oct 28, 2021                                               |
| Licensed Content Volume      | 24                                                         |
| Licensed Content Issue       | 4                                                          |
| Licensed Content Pages       | 22                                                         |

☒ About Your Work

|                           |                                                                                                                                      |
|---------------------------|--------------------------------------------------------------------------------------------------------------------------------------|
| Title of new article      | Recent Advances in Superhydrophobic & Antibacterial Cellulose-based Fibers and Fabrics: Bio-Inspiration, Strategies and Applications |
| Lead author               | Hua Zhou                                                                                                                             |
| Title of targeted journal | Advanced Fiber Materials                                                                                                             |
| Publisher                 | Springer Nature                                                                                                                      |
| Expected publication date | Mar 2023                                                                                                                             |

☒ Requestor Location

|                    |                                                       |
|--------------------|-------------------------------------------------------|
|                    | Qing Dao University<br>Qingdao University             |
| Requestor Location | Qing Dao, other<br>China<br>Attn: Qing Dao University |

☒ Price

|       |          |
|-------|----------|
| Total | 0.00 USD |
|-------|----------|

[Printable Details](#)

☒ Order Details

|                                                                                            |                     |
|--------------------------------------------------------------------------------------------|---------------------|
| Type of use                                                                                | Journal/Magazine    |
| Requestor type                                                                             | University/Academic |
| Is the reuse sponsored by or associated with a pharmaceutical or medical products company? | no                  |
| Format                                                                                     | Electronic          |
| Portion                                                                                    | Figure/table        |
| Number of figures/tables                                                                   | 1                   |
| Will you be translating?                                                                   | No                  |
| Circulation                                                                                | 500 - 999           |

☒ Additional Data

|                        |          |
|------------------------|----------|
| Order reference number | Figure14 |
| Portions               | Figure2  |

☒ Tax Details

|                  |             |
|------------------|-------------|
| Publisher Tax ID | EU826007151 |
|------------------|-------------|

Would you like to purchase the full text of this article? If so, please continue on to the content ordering system located here: [Purchase PDF](#)

If you click on the buttons below or close this window, you will not be able to return to the content ordering system.

CLOSE WINDOW

Total: 0.00 USD

ORDER MORE

© 2023 Copyright - All Rights Reserved | Copyright Clearance Center, Inc. | [Privacy statement](#) | [Data Security and Privacy](#) | [For California Residents](#)

[Terms and Conditions](#)Comments? We would like to hear from you. E-mail us at [customercare@copyright.com](mailto:customercare@copyright.com)

Figure 15a



 Home

 Help ▾

 Live Chat

 Hua Zhou ▾



ACS Publications  
Most Trusted. Most Cited. Most Read.

**Design of Antibacterial Surfaces and Interfaces: Polyelectrolyte Multilayers as a Multifunctional Platform**

Author: Jenny A. Lichter, Krystyn J. Van Vliet, Michael F. Rubner

Publication: Macromolecules

Publisher: American Chemical Society

Date: Nov 1, 2009

Copyright © 2009, American Chemical Society

**PERMISSION/LICENSE IS GRANTED FOR YOUR ORDER AT NO CHARGE**

This type of permission/license, instead of the standard Terms and Conditions, is sent to you because no fee is being charged for your order. Please note the following:

- Permission is granted for your request in both print and electronic formats, and translations.
- If figures and/or tables were requested, they may be adapted or used in part.
- Please print this page for your records and send a copy of it to your publisher/graduate school.
- Appropriate credit for the requested material should be given as follows: "Reprinted (adapted) with permission from (COMPLETE REFERENCE CITATION). Copyright (YEAR) American Chemical Society." Insert appropriate information in place of the capitalized words.
- One-time permission is granted only for the use specified in your RightsLink request. No additional uses are granted (such as derivative works or other editions). For any uses, please submit a new request.

If credit is given to another source for the material you requested from RightsLink, permission must be obtained from that source.

[BACK](#)[CLOSE WINDOW](#)

© 2023 Copyright - All Rights Reserved | Copyright Clearance Center, Inc. | [Privacy statement](#) | [Data Security and Privacy](#) | [For California Residents](#)  
| [Terms and Conditions](#)Comments? We would like to hear from you. E-mail us at [customer care@copyright.com](mailto:customer care@copyright.com)



 Home
  Help
  Live Chat
  Hua Zhou



**Role of trapped air in the formation of cell-and-protein micropatterns on superhydrophobic/superhydrophilic microtemplated surfaces**

**Author:** Qiaoling Huang, Longxiang Lin, Yun Yang, Ren Hu, Erwin A. Vogler, Changjian Lin

**Publication:** Biomaterials

**Publisher:** Elsevier

**Date:** November 2012

Copyright © 2012 Elsevier Ltd. All rights reserved.

**Order Completed**

Thank you for your order.

This Agreement between Qing Dao University -- Hua Zhou ("You") and Elsevier ("Elsevier") consists of your license details and the terms and conditions provided by Elsevier and Copyright Clearance Center.

Your confirmation email will contain your order number for future reference.

**License Number** 5512480056088 [Printable Details](#)

**License date** Mar 19, 2023

**Licensed Content**

|                              |                                                                                                                                     |
|------------------------------|-------------------------------------------------------------------------------------------------------------------------------------|
| Licensed Content Publisher   | Elsevier                                                                                                                            |
| Licensed Content Publication | Biomaterials                                                                                                                        |
| Licensed Content Title       | Role of trapped air in the formation of cell-and-protein micropatterns on superhydrophobic/superhydrophilic microtemplated surfaces |
| Licensed Content Author      | Qiaoling Huang, Longxiang Lin, Yun Yang, Ren Hu, Erwin A. Vogler, Changjian Lin                                                     |
| Licensed Content Date        | Nov 1, 2012                                                                                                                         |
| Licensed Content Volume      | 33                                                                                                                                  |
| Licensed Content Issue       | 33                                                                                                                                  |
| Licensed Content Pages       | 8                                                                                                                                   |

**Order Details**

|                                              |                                |
|----------------------------------------------|--------------------------------|
| Type of Use                                  | reuse in a journal/magazine    |
| Requestor type                               | academic/educational institute |
| Portion                                      | figures/tables/illustrations   |
| Number of figures/tables/illustrations       | 2                              |
| Format                                       | electronic                     |
| Are you the author of this Elsevier article? | Yes                            |
| Will you be translating?                     | No                             |

**About Your Work**

|                           |                                                                                                                                      |
|---------------------------|--------------------------------------------------------------------------------------------------------------------------------------|
| Title of new article      | Recent Advances in Superhydrophobic & Antibacterial Cellulose-based Fibers and Fabrics: Bio-Inspiration, Strategies and Applications |
| Lead author               | Hua Zhou                                                                                                                             |
| Title of targeted journal | Advanced Fiber Materials                                                                                                             |
| Publisher                 | Springer Nature                                                                                                                      |
| Expected publication date | Mar 2023                                                                                                                             |

**Additional Data**

|                        |            |
|------------------------|------------|
| Order reference number | Figure15   |
| Portions               | Figure 3,6 |

**Requestor Location**

|                    |                                                    |
|--------------------|----------------------------------------------------|
| Requestor Location | Qing Dao University<br>Qingdao University          |
| Requestor Location | Qing Dao, other China<br>Attn: Qing Dao University |

**Tax Details**

|                  |                |
|------------------|----------------|
| Publisher Tax ID | GB 494 6272 12 |
|------------------|----------------|

**Price**

|       |          |
|-------|----------|
| Total | 0.00 USD |
|-------|----------|

**Total: 0.00 USD**

CLOSE WINDOW

ORDER MORE

© 2023 Copyright - All Rights Reserved | Copyright Clearance Center, Inc. | Privacy statement | Data Security and Privacy | For California Residents | Terms and Conditions/Comments? We would like to hear from you. E-mail us at [customer@copyright.com](mailto:customer@copyright.com)



Figure 16a、b

[Home](#)
[Help](#)
[Live Chat](#)
[Hua Zhou](#)

### Inherent Guanidine Nanogels with Durable Antibacterial and Bacterially Antiadhesive Properties

Author: Xiao-Hong Qin, Jian-Yong Yu, Xue-Li Wang, et al  
Publication: Advanced Functional Materials  
Publisher: John Wiley and Sons  
Date: Jan 2, 2019

© 2019 WILEY-VCH Verlag GmbH & Co. KGaA, Weinheim

#### Order Completed

Thank you for your order.

This Agreement between Qing Dao University -- Hua Zhou ("You") and John Wiley and Sons ("John Wiley and Sons") consists of your license details and the terms and conditions provided by John Wiley and Sons and Copyright Clearance Center.

Your confirmation email will contain your order number for future reference.

License Number

5512480541899

License date

Mar 19, 2023

[Printable Details](#)

☒ Licensed Content

|                              |                                                                                                |
|------------------------------|------------------------------------------------------------------------------------------------|
| Licensed Content Publisher   | John Wiley and Sons                                                                            |
| Licensed Content Publication | Advanced Functional Materials                                                                  |
| Licensed Content Title       | Inherent Guanidine Nanogels with Durable Antibacterial and Bacterially Antiadhesive Properties |
| Licensed Content Author      | Xiao-Hong Qin, Jian-Yong Yu, Xue-Li Wang, et al                                                |
| Licensed Content Date        | Jan 2, 2019                                                                                    |
| Licensed Content Volume      | 29                                                                                             |
| Licensed Content Issue       | 12                                                                                             |
| Licensed Content Pages       | 17                                                                                             |

☐ Order Details

|                                                                                            |                     |
|--------------------------------------------------------------------------------------------|---------------------|
| Type of use                                                                                | Journal/Magazine    |
| Requestor type                                                                             | University/Academic |
| Is the reuse sponsored by or associated with a pharmaceutical or medical products company? | no                  |
| Format                                                                                     | Electronic          |
| Portion                                                                                    | Figure/table        |
| Number of figures/tables                                                                   | 2                   |
| Will you be translating?                                                                   | No                  |
| Circulation                                                                                | 100 - 199           |

☐ About Your Work

|                           |                                                                                                                                      |
|---------------------------|--------------------------------------------------------------------------------------------------------------------------------------|
| Title of new article      | Recent Advances in Superhydrophobic & Antibacterial Cellulose-based Fibers and Fabrics: Bio-Inspiration, Strategies and Applications |
| Lead author               | Hua Zhou                                                                                                                             |
| Title of targeted journal | Advanced Fiber Materials                                                                                                             |
| Publisher                 | Springer Nature                                                                                                                      |
| Expected publication date | Mar 2023                                                                                                                             |

☐ Additional Data

|                        |          |
|------------------------|----------|
| Order reference number | Figure16 |
| Portions               | Schem3,4 |

☐ Requestor Location

|                    |                                                       |
|--------------------|-------------------------------------------------------|
| Requestor Location | Qing Dao University<br>Qingdao University             |
| Requestor Location | Qing Dao, other<br>China<br>Attn: Qing Dao University |

☐ Tax Details

|                  |             |
|------------------|-------------|
| Publisher Tax ID | EU826007151 |
|------------------|-------------|

**\$ Price**

|       |          |
|-------|----------|
| Total | 0.00 USD |
|-------|----------|

☐ Would you like to purchase the full text of this article? If so, please continue on to the content ordering system located here:  
[Purchase PDF](#)  
If you click on the buttons below or close this window, you will not be able to return to the content ordering system.

Total: 0.00 USD

CLOSE WINDOW

ORDER MORE

© 2023 Copyright - All Rights Reserved | Copyright Clearance Center, Inc. | Privacy statement | Data Security and Privacy | For California Residents  
Terms and ConditionsComments? We would like to hear from you. E-mail us at [customercare@copyright.com](mailto:customercare@copyright.com)

Figure 16c、d

[Home](#)
[Help](#)
[Live Chat](#)
[Hua Zhou](#)

**Textile coatings configured by double-nanoparticles to optimally couple superhydrophobic and antibacterial properties**

Author: Zhanpeng Ye, Shuangyang Li, Shuyue Zhao, Liandong Deng, Jianhua Zhang, Anjie Dong

Publication: Chemical Engineering Journal

Publisher: Elsevier

Date: 15 September 2021

© 2020 Elsevier B.V. All rights reserved.

**Order Completed**

Thank you for your order.

This Agreement between Qing Dao University -- Hua Zhou ("You") and Elsevier ("Elsevier") consists of your license details and the terms and conditions provided by Elsevier and Copyright Clearance Center.

Your confirmation email will contain your order number for future reference.

License Number: 5512480966551 [Printable Details](#)

License date: Mar 19, 2023

**Licensed Content**

Licensed Content Publisher: Elsevier

Licensed Content Publication: Chemical Engineering Journal

Licensed Content Title: Textile coatings configured by double-nanoparticles to optimally couple superhydrophobic and antibacterial properties

Licensed Content Author: Zhanpeng Ye, Shuangyang Li, Shuyue Zhao, Liandong Deng, Jianhua Zhang, Anjie Dong

Licensed Content Date: Sep 15, 2021

Licensed Content Volume: 420

Licensed Content Issue: n/a

Licensed Content Pages: 1

**Order Details**

Type of Use: reuse in a journal/magazine

Requestor type: academic/educational institute

Portion: figures/tables/illustrations

Number of figures/tables/illustrations: 2

Format: electronic

Are you the author of this Elsevier article?: Yes

Will you be translating?: No

**About Your Work**

Title of new article: Recent Advances in Superhydrophobic & Antibacterial Cellulose-based Fibers and Fabrics: Bio-Inspiration, Strategies and Applications

Lead author: Hua Zhou

Title of targeted journal: Advanced Fiber Materials

Publisher: Springer Nature

Expected publication date: Mar 2023

**Additional Data**

Order reference number: Figure16

Portions: Scheme 1, Figure 6

**Requestor Location**

Qing Dao University  
Qingdao University

Requestor Location: Qing Dao, other China  
Attn: Qing Dao University

**Tax Details**

Publisher Tax ID: GB 494 6272 12

**\$ Price**

Total: 0.00 USD

**Total: 0.00 USD**

[CLOSE WINDOW](#) [ORDER MORE](#)

© 2023 Copyright - All Rights Reserved | Copyright Clearance Center, Inc. | [Privacy statement](#) | [Data Security and Privacy](#) | [For California Residents](#)

[Terms and Conditions](#) Comments? We would like to hear from you. E-mail us at [customer@copyright.com](mailto:customer@copyright.com)

Figure 17



 Home

 Help ▾

 Live Chat

 Hua Zhou ▾



ACS Publications  
Most Trusted. Most Cited. Most Read.

**Chemical Insights into Antibacterial N-Halamines**

**Author:** Alideertu Dong, Yan-jie Wang, Yangyang Gao, et al

**Publication:** Chemical Reviews

**Publisher:** American Chemical Society

**Date:** Mar 1, 2017

*Copyright © 2017, American Chemical Society*

**PERMISSION/LICENSE IS GRANTED FOR YOUR ORDER AT NO CHARGE**

This type of permission/license, instead of the standard Terms and Conditions, is sent to you because no fee is being charged for your order. Please note the following:

- Permission is granted for your request in both print and electronic formats, and translations.
- If figures and/or tables were requested, they may be adapted or used in part.
- Please print this page for your records and send a copy of it to your publisher/graduate school.
- Appropriate credit for the requested material should be given as follows: "Reprinted (adapted) with permission from {COMPLETE REFERENCE CITATION}, Copyright (YEAR) American Chemical Society." Insert appropriate information in place of the capitalized words.
- One-time permission is granted only for the use specified in your RightsLink request. No additional uses are granted (such as derivative works or other editions). For any uses, please submit a new request.

If credit is given to another source for the material you requested from RightsLink, permission must be obtained from that source.

[BACK](#)[CLOSE WINDOW](#)

© 2023 Copyright - All Rights Reserved | Copyright Clearance Center, Inc. | Privacy statement | Data Security and Privacy | For California Residents  
| Terms and ConditionsComments? We would like to hear from you. E-mail us at [customer care@copyright.com](mailto:customer care@copyright.com)

Figure 18a



Home

Help

Live Chat

Hua Zhou



**Metal-organic frameworks: mechanisms of antibacterial action and potential applications**  
Author: Gabriela Wyszogrodzka, Bartosz Marszałek, Barbara Gil, Przemysław Dorożyński  
Publication: Drug Discovery Today  
Publisher: Elsevier  
Date: June 2016  
© 2016 Elsevier Ltd. All rights reserved.

**Order Completed**

Thank you for your order.

This Agreement between Qing Dao University -- Hua Zhou ("You") and Elsevier ("Elsevier") consists of your license details and the terms and conditions provided by Elsevier and Copyright Clearance Center.

Your confirmation email will contain your order number for future reference.

License Number5512490215697

License dateMar 19, 2023

Licensed Content

|                              |                                                                                         |
|------------------------------|-----------------------------------------------------------------------------------------|
| Licensed Content Publisher   | Elsevier                                                                                |
| Licensed Content Publication | Drug Discovery Today                                                                    |
| Licensed Content Title       | Metal-organic frameworks: mechanisms of antibacterial action and potential applications |
| Licensed Content Author      | Gabriela Wyszogrodzka, Bartosz Marszałek, Barbara Gil, Przemysław Dorożyński            |
| Licensed Content Date        | Jun 1, 2016                                                                             |
| Licensed Content Volume      | 21                                                                                      |
| Licensed Content Issue       | 6                                                                                       |
| Licensed Content Pages       | 10                                                                                      |

About Your Work

|                           |                                                                                                                                      |
|---------------------------|--------------------------------------------------------------------------------------------------------------------------------------|
| Title of new article      | Recent Advances in Superhydrophobic & Antibacterial Cellulose-based Fibers and Fabrics: Bio-Inspiration, Strategies and Applications |
| Lead author               | Hua Zhou                                                                                                                             |
| Title of targeted journal | Advanced Fiber Materials                                                                                                             |
| Publisher                 | Springer Nature                                                                                                                      |
| Expected publication date | Mar 2023                                                                                                                             |

Requestor Location

|                    |                                                       |
|--------------------|-------------------------------------------------------|
| Requestor Location | Qing Dao University<br>Qingdao University             |
|                    | Qing Dao, other<br>China<br>Attn: Qing Dao University |

\$ Price

|       |          |
|-------|----------|
| Total | 0.00 USD |
|-------|----------|

Order Details

|                                              |                                |
|----------------------------------------------|--------------------------------|
| Type of Use                                  | reuse in a journal/magazine    |
| Requestor type                               | academic/educational institute |
| Portion                                      | figures/tables/illustrations   |
| Number of figures/tables/illustrations       | 1                              |
| Format                                       | electronic                     |
| Are you the author of this Elsevier article? | Yes                            |
| Will you be translating?                     | No                             |

Additional Data

|                        |          |
|------------------------|----------|
| Order reference number | Figure18 |
| Portions               | Figure1  |

Tax Details

|                  |                |
|------------------|----------------|
| Publisher Tax ID | GB 494 6272 12 |
|------------------|----------------|

Total: 0.00 USD

CLOSE WINDOW

ORDER MORE

© 2023 Copyright - All Rights Reserved | Copyright Clearance Center, Inc. | Privacy statement | Data Security and Privacy | For California Residents

Terms and ConditionsComments? We would like to hear from you. E-mail us at [customer@copyright.com](mailto:customer@copyright.com)

Home

Help

Live Chat

Hua Zhou

### Silver-Nanoparticle-Colored Cotton Fabrics with Tunable Colors and Durable Antibacterial and Self-Healing Superhydrophobic Properties

Author: Junqi Sun, Shanshan Chen, Tiezheng Pan, et al

Publication: Advanced Functional Materials

Publisher: John Wiley and Sons

Date: Dec 15, 2015

© 2015 WILEY-VCH Verlag GmbH & Co. KGaA, Weinheim

#### Order Completed

Thank you for your order.

This Agreement between Qing Dao University -- Hua Zhou ("You") and John Wiley and Sons ("John Wiley and Sons") consists of your license details and the terms and conditions provided by John Wiley and Sons and Copyright Clearance Center.

Your confirmation email will contain your order number for future reference.

License Number

5512490817988

Printable Details

License date

Mar 19, 2023

Licensed Content

|                              |                                                                                                                                       |
|------------------------------|---------------------------------------------------------------------------------------------------------------------------------------|
| Licensed Content Publisher   | John Wiley and Sons                                                                                                                   |
| Licensed Content Publication | Advanced Functional Materials                                                                                                         |
| Licensed Content Title       | Silver-Nanoparticle-Colored Cotton Fabrics with Tunable Colors and Durable Antibacterial and Self-Healing Superhydrophobic Properties |
| Licensed Content Author      | Junqi Sun, Shanshan Chen, Tiezheng Pan, et al                                                                                         |
| Licensed Content Date        | Dec 15, 2015                                                                                                                          |
| Licensed Content Volume      | 26                                                                                                                                    |
| Licensed Content Issue       | 4                                                                                                                                     |
| Licensed Content Pages       | 8                                                                                                                                     |

Order Details

|                                                                                            |                     |
|--------------------------------------------------------------------------------------------|---------------------|
| Type of use                                                                                | Journal/Magazine    |
| Requestor type                                                                             | University/Academic |
| Is the reuse sponsored by or associated with a pharmaceutical or medical products company? | no                  |
| Format                                                                                     | Electronic          |
| Portion                                                                                    | Figure/table        |
| Number of figures/tables                                                                   | 2                   |
| Will you be translating?                                                                   | No                  |
| Circulation                                                                                | 500 - 999           |

About Your Work

|                           |                                                                                                                                      |
|---------------------------|--------------------------------------------------------------------------------------------------------------------------------------|
| Title of new article      | Recent Advances in Superhydrophobic & Antibacterial Cellulose-based Fibers and Fabrics: Bio-Inspiration, Strategies and Applications |
| Lead author               | Hua Zhou                                                                                                                             |
| Title of targeted journal | Advanced Fiber Materials                                                                                                             |
| Publisher                 | Springer Nature                                                                                                                      |
| Expected publication date | Mar 2023                                                                                                                             |

Additional Data

|                        |           |
|------------------------|-----------|
| Order reference number | Figure18  |
| Portions               | Figure1,3 |

Requestor Location

|                    |                                                    |
|--------------------|----------------------------------------------------|
| Requestor Location | Qing Dao University<br>Qingdao University          |
|                    | Qing Dao, other China<br>Attn: Qing Dao University |

Tax Details

|                  |             |
|------------------|-------------|
| Publisher Tax ID | EU826007151 |
|------------------|-------------|

Price

|       |          |
|-------|----------|
| Total | 0.00 USD |
|-------|----------|

Would you like to purchase the full text of this article? If so, please continue on to the content ordering system located here:

[Purchase PDF](#)

If you click on the buttons below or close this window, you will not be able to return to the content ordering system.

Total: 0.00 USD

CLOSE WINDOW

ORDER MORE

© 2023 Copyright - All Rights Reserved | Copyright Clearance Center, Inc. | Privacy statement | Data Security and Privacy | For California Residents | Terms and ConditionsComments? We would like to hear from you. E-mail us at [customercare@copyright.com](mailto:customercare@copyright.com)

Figure 18c

CCC Marketplace

Hua Zhou

Cart

Help

Live Chat

Payment Details

Review Details

Confirmation Details

Thank you, your order has been placed. An email confirmation has been sent to you. Your order license details and printable licenses will be available within 24 hours. Please access Manage Account for final order details.

### CUSTOMER INFORMATION

Payment by invoice: You can cancel your order until the invoice is generated by contacting customer service.

Billing Address

Prof Hua Zhou  
Qing Dao University  
Qingdao University  
Qing Dao  
China  
+86 13470894233  
670299905@qq.com

Customer Location

Prof Hua Zhou  
Qing Dao University  
Qingdao University  
Qing Dao  
China

PO Number (optional)

N/A

Payment options

Invoice

### PENDING ORDER CONFIRMATION

Confirmation Number: Pending

Order Date: 19-Mar-2023

Print Friendly Format

Includes Publisher Terms and Conditions

1. Chemical Society reviews

0.00 USD

Article: Nanosilver-based antibacterial drugs and devices: mechanisms, methodological drawbacks, and guidelines.

Order License ID

Pending

Publisher

ROYAL SOCIETY OF CHEMISTRY

ISSN

1460-4744

Portion

Image/photo/illustration

Type of Use

Republish in a journal/magazine

View Details

Print License

Total Items: 1

Total Due: 0.00 USD

Accepted: Marketplace Permissions General Terms and Conditions and any applicable Publisher Terms and Conditions

Continue Shopping

© 2023 Copyright Clearance Center | About Us | Terms & Conditions | Privacy Policy | Data Security and Privacy | For California Residents | Contact Us

Figure 19

[Home](#)
[Help](#)
[Live Chat](#)
[Hua Zhou](#)

**Assessment of 2,2,6,6-tetramethyl-4-piperidinol-based amine N-halamine-labeled silica nanoparticles as potent antibiotics for deactivating bacteria**  
**Author:** Chenghao Li, Jingjing Hou, Zhen Huang, Tianyi Zhao, Linghan Xiao, Ge Gao, Chokto Harnood, Alideertu Dong  
**Publication:** Colloids and Surfaces B: Biointerfaces  
**Publisher:** Elsevier  
**Date:** 1 February 2015  
Copyright © 2014 Elsevier B.V. All rights reserved.

### Order Completed

Thank you for your order.

This Agreement between Qing Dao University -- Hua Zhou ("You") and Elsevier ("Elsevier") consists of your license details and the terms and conditions provided by Elsevier and Copyright Clearance Center.

Your confirmation email will contain your order number for future reference.

License Number: 5512500363278 [Printable Details](#)

License date: Mar 19, 2023

#### Licensed Content

**Licensed Content Publisher** Elsevier  
**Licensed Content Publication** Colloids and Surfaces B: Biointerfaces  
**Licensed Content Title** Assessment of 2,2,6,6-tetramethyl-4-piperidinol-based amine N-halamine-labeled silica nanoparticles as potent antibiotics for deactivating bacteria  
**Licensed Content Author** Chenghao Li, Jingjing Hou, Zhen Huang, Tianyi Zhao, Linghan Xiao, Ge Gao, Chokto Harnood, Alideertu Dong  
**Licensed Content Date** Feb 1, 2015  
**Licensed Content Volume** 126  
**Licensed Content Issue** n/a  
**Licensed Content Pages** 9

#### Order Details

**Type of Use** reuse in a journal/magazine  
**Requestor type** academic/educational institute  
**Portion** figures/tables/illustrations  
**Number of figures/tables/illustrations** 1  
**Format** electronic  
**Are you the author of this Elsevier article?** Yes  
**Will you be translating?** No

#### About Your Work

**Title of new article** Recent Advances in Superhydrophobic & Antibacterial Cellulose-based Fibers and Fabrics: Bio-Inspiration, Strategies and Applications  
**Lead author** Hua Zhou  
**Title of targeted journal** Advanced Fiber Materials  
**Publisher** Springer Nature  
**Expected publication date** Mar 2023

#### Additional Data

**Order reference number** Figure19  
**Portions** Figure7

#### Requestor Location

**Requestor Location** Qing Dao University  
 Qingdao University  
 Qing Dao, other  
 China  
 Attn: Qing Dao University

#### Tax Details

**Publisher Tax ID** GB 494 6272 12

**\$ Price**

Total: 0.00 USD

**Total: 0.00 USD**

[CLOSE WINDOW](#)
[ORDER MORE](#)

© 2023 Copyright - All Rights Reserved | Copyright Clearance Center, Inc. | Privacy statement | Data Security and Privacy | For California Residents  
 | Terms and Conditions Comments? We would like to hear from you. E-mail us at [customer-care@copyright.com](mailto:customer-care@copyright.com)



Figure 20

[Home](#)
[Help](#)
[Live Chat](#)
[Hua Zhou](#)

**Fabrication of coral-reef structured nano silica for self-cleaning and super-hydrophobic textile applications**

Author: Aima Sameen Anjum, Kyung Chul Sun, Mumtaz Ali, Rabia Riaz, Sung Hoon Jeong

Publication: Chemical Engineering Journal

Publisher: Elsevier

Date: 1 December 2020

© 2020 Elsevier B.V. All rights reserved.

### Order Completed

Thank you for your order.

This Agreement between Qing Dao University -- Hua Zhou ("You") and Elsevier ("Elsevier") consists of your license details and the terms and conditions provided by Elsevier and Copyright Clearance Center.

Your confirmation email will contain your order number for future reference.

License Number

5512510288281

License date

Mar 19, 2023

☒ Licensed Content

|                              |                                                                                                               |
|------------------------------|---------------------------------------------------------------------------------------------------------------|
| Licensed Content Publisher   | Elsevier                                                                                                      |
| Licensed Content Publication | Chemical Engineering Journal                                                                                  |
| Licensed Content Title       | Fabrication of coral-reef structured nano silica for self-cleaning and super-hydrophobic textile applications |
| Licensed Content Author      | Aima Sameen Anjum, Kyung Chul Sun, Mumtaz Ali, Rabia Riaz, Sung Hoon Jeong                                    |
| Licensed Content Date        | Dec 1, 2020                                                                                                   |
| Licensed Content Volume      | 401                                                                                                           |
| Licensed Content Issue       | n/a                                                                                                           |
| Licensed Content Pages       | 1                                                                                                             |

☒ About Your Work

|                           |                                                                                                                                      |
|---------------------------|--------------------------------------------------------------------------------------------------------------------------------------|
| Title of new article      | Recent Advances in Superhydrophobic & Antibacterial Cellulose-based Fibers and Fabrics: Bio-Inspiration, Strategies and Applications |
| Lead author               | Hua Zhou                                                                                                                             |
| Title of targeted journal | Advanced Fiber Materials                                                                                                             |
| Publisher                 | Springer Nature                                                                                                                      |
| Expected publication date | Mar 2023                                                                                                                             |

☒ Requestor Location

|                    |                                                    |
|--------------------|----------------------------------------------------|
| Requestor Location | Qing Dao University<br>Qingdao University          |
|                    | Qing Dao, other China<br>Attn: Qing Dao University |

☒ Tax Details

|                  |                |
|------------------|----------------|
| Publisher Tax ID | GB 494 6272 12 |
|------------------|----------------|

[Printable Details](#)

### Order Details

|                                              |                                |
|----------------------------------------------|--------------------------------|
| Type of Use                                  | reuse in a journal/magazine    |
| Requestor type                               | academic/educational institute |
| Portion                                      | figures/tables/illustrations   |
| Number of figures/tables/illustrations       | 3                              |
| Format                                       | electronic                     |
| Are you the author of this Elsevier article? | Yes                            |
| Will you be translating?                     | No                             |

### Additional Data

|                        |                               |
|------------------------|-------------------------------|
| Order reference number | Figure20                      |
| Portions               | GRAPHICAL ABSTRACT Figure 2,3 |

**\$ Price**

|       |          |
|-------|----------|
| Total | 0.00 USD |
|-------|----------|

**Total: 0.00 USD**

[CLOSE WINDOW](#)
[ORDER MORE](#)

© 2023 Copyright - All Rights Reserved | Copyright Clearance Center, Inc. | Privacy statement | Data Security and Privacy | For California Residents

Terms and ConditionsComments? We would like to hear from you. E-mail us at [customer@copyright.com](mailto:customer@copyright.com)
